# Supplementary material for: I2-Catalyzed oxidative dehydrogenative tandem cyclization of 2-methylquinolines, arylamines and 1,4-dioxane
Source: Royal Society of Chemistry journal article supplement (doi:10.1039/d1qo01125a), 2021-01-01

## Supporting information for

### **I<sub>2</sub>-Catalyzed Oxidative Dehydrogenative Tandem Cyclization of 2-Methylquinolines, Arylamines and 1,4-Dioxane**

Hongrui Qi,<sup>\*a</sup> Yiyan Yan,<sup>a</sup> Yunfeng Liao,<sup>\*a,b</sup> Furong Jiang,<sup>a</sup> Hualan Gao,<sup>a</sup> and Guo-jun Deng<sup>\*a</sup>

<sup>a</sup> Key Laboratory for Green Organic Synthesis and Application of Hunan Province, Key Laboratory of Environmentally Friendly Chemistry and Application of Ministry of Education, College of Chemistry, Xiangtan University, Xiangtan 411105, China; Email: 1748578701@qq.com; gjdeng@xtu.edu.cn.

<sup>b</sup> Hunan Provincial Key Laboratory of Environmental Catalysis & Waste Recycling, College of Materials and Chemical Engineering, Hunan Institute of Engineering, Xiangtan, 411104, China; Email: liaoyunfeng900@126.com.

#### Table of Contents

|                                                                                  |              |
|----------------------------------------------------------------------------------|--------------|
| <b>1. General information</b>                                                    | <b>2</b>     |
| <b>2. General procedure for preparation</b>                                      | <b>2</b>     |
| <b>3. Characterization data of products</b>                                      | <b>2-14</b>  |
| <b>4. References</b>                                                             | <b>14</b>    |
| <b>5. Crystal data and structure refinement for 4j</b>                           | <b>15-21</b> |
| <b>6. Copies of <sup>1</sup>H and <sup>13</sup>C NMR spectra of all products</b> | <b>22-43</b> |

### General information:

All reactions were carried out under an atmosphere of air unless otherwise noted. Column chromatography was performed using silica gel (200-300 mesh). <sup>1</sup>H NMR and <sup>13</sup>C NMR spectra were recorded on Bruker-AV (400 and 100 MHz, respectively) instrument internally referenced to tetramethylsilane (TMS) or chloroform signals. Mass spectra was measured on bruker 15T HRMS instrument (maldi). Melting points were measured with a YUHUA X-5 melting point instrument and were uncorrected. All reagents were obtained from commercial suppliers and used without further purification.

### General procedure for preparation (4a):

A 10 mL sealed tube was added 2-methylquinoline (**1a**, 80  $\mu$ L, 0.6 mmol), aniline (**2a**, 18  $\mu$ L, 0.2 mmol), 70%TBHP (62  $\mu$ L, 0.44 mmol), 1,4-dioxane (1.5 mL) by syringe. The reaction vessel was stirred at 110  $^{\circ}$ C for 16 h. After cooling to room temperature, the volatiles were removed under reduced pressure. The residue was purified by column chromatography on silica gel (petroleum ether/EtOAc =1:1) to yield the desired product **4a** as yellow oil (38.5 mg, 60% yield).

### Preparation of 3-(2-bromoethoxy)-2,2'-biquinoline (4ab):<sup>[1]</sup>

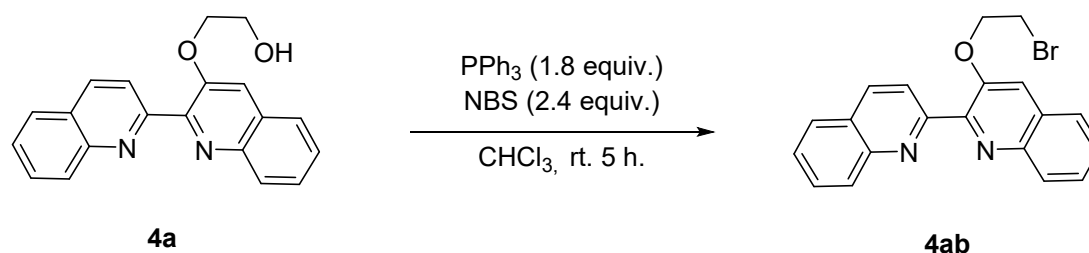

NBS (40.6 mg, 0.226 mmol), **4a** (29.4 mg, 0.093 mmol) and 1 mL CHCl<sub>3</sub> were added to a 10 mL reaction tube. After the reaction vessel was stirred for 30 minutes at room temperature, PPh<sub>3</sub> (44.6 mg, 0.170 mmol) was added to the reaction vessel and the sealed tube stirred for 5h at room temperature. The volatiles were removed under reduced pressure. The residue was purified by column chromatography on silica gel (petroleum ether/EtOAc =1:1) to yield the desired product **4ab** as yellow liquid (33.3 mg, 95% yield).

### 2-([2,2'-biquinolin]-3-yloxy)ethan-1-ol (4a)

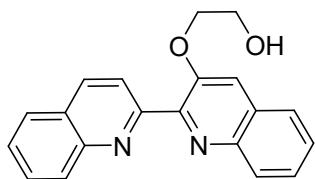

$^1\text{H}$  NMR (400 MHz,  $\text{CDCl}_3$ , ppm)  $\delta$  8.39 (d,  $J = 8.4$ , 1H), 8.26 (d,  $J = 8.4$  Hz, 1H), 8.20 (d,  $J = 8.4$  Hz, 1H), 8.15 (d,  $J = 8.0$  Hz, 1H), 7.90 (d,  $J = 8.4$  Hz, 1H), 7.81-7.75 (m, 3H), 7.65-7.55 (m, 3H), 4.52 (t,  $J = 4.2$  Hz, 2H), 4.00 (t,  $J = 4.2$  Hz, 2H);  $^{13}\text{C}$  NMR (100 MHz,  $\text{CDCl}_3$ , ppm)  $\delta$  156.4, 151.8, 150.8, 146.8, 143.5, 137.3, 130.1, 129.5, 129.2, 128.7, 127.7, 127.6, 127.6, 127.6, 127.2, 126.4, 122.6, 119.0, 73.2, 60.7; HRMS (maldi,  $m/z$ ): calcd. for  $\text{C}_{20}\text{H}_{17}\text{N}_2\text{O}_2$   $[\text{M}+\text{H}]^+$  317.1290, found 317.1291.

#### 2-((6'-methoxy-[2,2'-biquinolin]-3-yl)oxy)ethan-1-ol (4c)

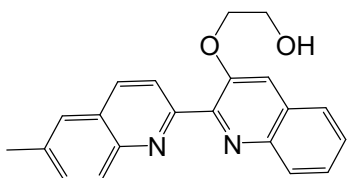

The reaction was conducted with 6-methyl-quinolin (**1b**, 94.4 mg, 0.6 mmol) and aniline (**2a**, 18  $\mu\text{L}$ , 0.2 mmol). The residue was purified by column chromatography on silica gel (petroleum ether/EtOAc = 1:1) afforded the product **4b** as reddish-brown oil (24.5 mg, 37%).

$^1\text{H}$  NMR (400 MHz,  $\text{CDCl}_3$ , ppm)  $\delta$  8.29 (d,  $J = 8.8$  Hz, 1H), 8.17-8.13 (m, 3H), 7.78 (d,  $J = 8.0$  Hz, 1H), 7.73 (s, 1H), 7.65-7.54 (m, 4H), 6.62 (brs, 1H), 4.52 (t,  $J = 4.4$  Hz, 2H), 4.00 (t,  $J = 4.4$  Hz, 2H), 2.57 (s, 3H);  $^{13}\text{C}$  NMR (100 MHz,  $\text{CDCl}_3$ , ppm)  $\delta$  155.5, 151.9, 151.0, 145.4, 143.5, 137.2, 136.7, 132.4, 129.5, 129.2, 128.4, 127.8, 127.6, 127.6, 126.4, 126.4, 122.6, 119.1, 73.3, 60.7, 21.6; HRMS (maldi,  $m/z$ ): calcd. for  $\text{C}_{21}\text{H}_{19}\text{N}_2\text{O}_2$   $[\text{M}+\text{H}]^+$  331.1447, found 331.1445.

#### 2-((6'-methoxy-[2,2'-biquinolin]-3-yl)oxy)ethan-1-ol (4c)

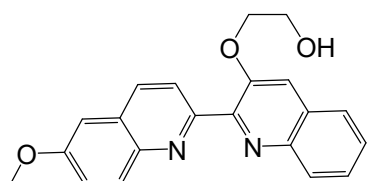

The reaction was conducted with 6-methoxyquinoline (**1c**, 103.9 mg, 0.6 mmol), 70%TBHP (84  $\mu\text{L}$ , 0.6 mmol) and aniline (**2a**, 18  $\mu\text{L}$ , 0.2 mmol). The residue was purified by column

chromatography on silica gel (petroleum ether/EtOAc = 1:1) afforded the product **4c** as reddish-brown oil (32.4 mg, 47%).

<sup>1</sup>H NMR (400 MHz, CDCl<sub>3</sub>, ppm) δ 8.27 (d, *J* = 8.8 Hz, 1H), 8.18-8.13 (m, 3H), 7.78 (d, *J* = 8.0 Hz, 1H), 7.73 (s, 1H), 7.64-7.61 (m, 1H), 7.55 (t, *J* = 7.4 Hz, 1H), 7.41 (dd, *J* = 2.4, 9.2 Hz, 1H), 7.14 (d, *J* = 2.4 Hz, 1H), 6.61 (brs, 1H), 4.51 (t, *J* = 4.0 Hz, 2H), 4.01-3.97 (m, 5H); <sup>13</sup>C NMR (100 MHz, CDCl<sub>3</sub>, ppm) δ 158.3, 154.0, 151.9, 150.9, 143.5, 142.9, 136.0, 130.2, 129.4, 129.1, 129.0, 127.6, 127.5, 126.5, 122.9, 119.1, 104.9, 73.3, 60.7, 55.5. HRMS (maldi, *m/z*): calcd. for C<sub>21</sub>H<sub>19</sub>N<sub>2</sub>O<sub>3</sub> [M+H]<sup>+</sup> 347.1396, found 347.1395.

#### methyl 3'-(2-hydroxyethoxy)-[2,2'-biquinoline]-6-carboxylate (**4d**)

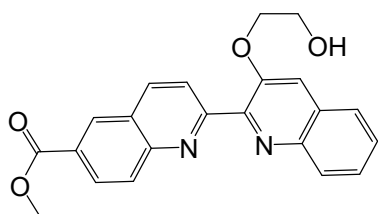

The reaction was conducted with 2-methylquinoline-6-carboxylate (**1d**, 120.7 mg, 0.6 mmol), 70%TBHP (84 μL, 0.6 mmol) and aniline (**2a**, 18 μL, 0.2 mmol). The residue was purified by column chromatography on silica gel (petroleum ether/EtOAc = 1:1) afforded the product **4d** as yellow oil (24.8 mg, 33%).

<sup>1</sup>H NMR (400 MHz, CDCl<sub>3</sub>, ppm) δ 8.67 (s, 1H), 8.49 (d, *J* = 8.8 Hz, 1H), 8.36-8.28 (m, 3H), 8.14 (d, *J* = 8.4 Hz, 1H), 7.81 (t, *J* = 8.0 Hz, 1H), 7.76 (s, 1H), 7.67-7.57 (m, 2H), 4.53 (t, *J* = 4.2 Hz, 2H), 4.02-4.00 (m, 5H); <sup>13</sup>C NMR (100 MHz, CDCl<sub>3</sub>, ppm) δ 166.5, 158.6, 151.9, 150.2, 148.8, 143.6, 138.5, 130.7, 129.6, 129.6, 129.4, 129.2, 128.6, 127.9, 127.8, 126.9, 126.4, 123.5, 119.1, 73.2, 60.7, 52.5; HRMS(maldi, *m/z*): calcd. for C<sub>22</sub>H<sub>19</sub>N<sub>2</sub>O<sub>4</sub> [M+H]<sup>+</sup> 375.1435, found 375.1344.

#### 2-((6'-fluoro-[2,2'-biquinolin]-3-yl)oxy)ethan-1-ol (**4e**)

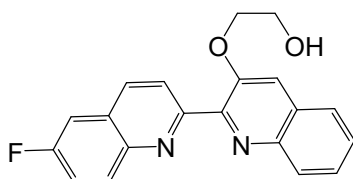

The reaction was conducted with 6-fluoro-2-methylquinoline (**1e**, 96.7 mg, 0.6 mmol), 70%TBHP (84  $\mu$ L, 0.6 mmol) and aniline (**2a**, 18  $\mu$ L, 0.2 mmol). The residue was purified by column chromatography on silica gel (petroleum ether/EtOAc = 2:1) afforded the product **4e** as reddish-brown oil (28.6 mg, 43%).

$^1\text{H}$  NMR (400 MHz,  $\text{CDCl}_3$ , ppm)  $\delta$  8.38 (d,  $J = 8.4$  Hz, 1H), 8.19 (d,  $J = 8.4$  Hz, 1H), 8.14 (d,  $J = 8.4$  Hz, 1H), 7.93-7.88 (m, 2H), 7.80 (d,  $J = 8.4$  Hz, 1H), 7.76 (s, 1H), 7.64 (t,  $J = 7.0$  Hz, 1H), 7.58 (t,  $J = 7.0$  Hz, 1H), 7.43-7.48 (m, 1H), 4.52 (t,  $J = 4.2$  Hz, 2H), 4.01 (t,  $J = 4.4$  Hz, 2H);  $^{13}\text{C}$  NMR (100 MHz,  $\text{CDCl}_3$ , ppm)  $\delta$  163.4 (d,  $J = 249.1$  Hz), 157.5, 151.9, 150.4, 147.8 (d,  $J = 12.4$  Hz), 143.6, 137.3, 129.6 (d,  $J = 9.9$  Hz), 129.6, 129.3, 127.8 (d,  $J = 8.5$  Hz), 126.4, 124.8, 122.0, 122.0, 119.2, 117.8 (d,  $J = 25.3$  Hz), 112.6 (d,  $J = 20.7$  Hz), 73.4, 60.7. HRMS (maldi,  $m/z$ ): calcd. for  $\text{C}_{20}\text{H}_{16}\text{N}_2\text{O}_2\text{F}$   $[\text{M}+\text{H}]^+$  335.1196, found 335.1194.

#### 2-((6'-bromo-[2,2'-biquinolin]-3-yl)oxy)ethan-1-ol (**4f**)

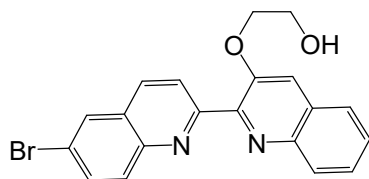

The reaction was conducted with 6-bromo-2-methylquinoline (**1f**, 133.2 mg, 0.6 mmol), 70%TBHP (84  $\mu$ L, 0.6 mmol) and aniline (**2a**, 18  $\mu$ L, 0.2 mmol). The residue was purified by column chromatography on silica gel (petroleum ether/EtOAc = 2:1) afforded the product **4f** as yellow oil (39.6 mg, 50%).

$^1\text{H}$  NMR (400 MHz,  $\text{CDCl}_3$ , ppm)  $\delta$  8.27 (q,  $J = 8.9$  Hz, 2H), 8.13 (q,  $J = 4.3$  Hz, 2H), 8.06 (d,  $J = 1.6$  Hz, 1H), 7.84-7.79 (m, 2H), 7.74 (s, 1H), 7.66-7.56 (m, 2H), 6.25 (brs, 1H), 4.52 (t,  $J = 4.4$  Hz, 2H), 4.00 (t,  $J = 4.2$  Hz, 2H);  $^{13}\text{C}$  NMR (100 MHz,  $\text{CDCl}_3$ , ppm)  $\delta$  156.8, 151.8, 150.2, 145.4, 143.5, 136.3, 133.5, 130.5, 129.6, 129.6, 129.3, 128.8, 127.8, 127.7, 126.4, 123.6, 121.2, 119.0, 73.1, 60.7. HRMS (maldi,  $m/z$ ): calcd. for  $\text{C}_{20}\text{H}_{16}\text{N}_2\text{O}_2\text{Br}$   $[\text{M}+\text{H}]^+$  395.0395, found 395.0395.

#### 2-((7'-chloro-[2,2'-biquinolin]-3-yl)oxy)ethan-1-ol (**4g**)

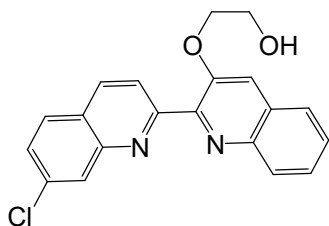

The reaction was conducted with 7-chloro-2-methylquinoline (**1g**, 106.6 mg, 0.6 mmol), 70%TBHP (84  $\mu$ L, 0.6 mmol) and aniline (**2a**, 18  $\mu$ L, 0.2 mmol). The residue was purified by column chromatography on silica gel (petroleum ether/EtOAc = 2:1) afforded the product **4g** as brown oil (41.8 mg, 60%).

$^1\text{H}$  NMR (400 MHz,  $\text{CDCl}_3$ , ppm)  $\delta$  8.36 (d,  $J$  = 8.4 Hz, 1H), 8.26 (d,  $J$  = 1.2 Hz, 1H), 8.21 (d,  $J$  = 8.8 Hz, 1H), 8.13 (d,  $J$  = 8.4 Hz, 1H), 7.84-7.79 (m, 2H), 7.75 (s, 1H), 7.66-7.62 (m, 1H), 7.59-7.54 (m, 2H), 6.25 (brs, 1H), 4.52 (t,  $J$  = 4.2 Hz, 2H), 4.00 (t,  $J$  = 4.2 Hz, 2H);  $^{13}\text{C}$  NMR (100 MHz,  $\text{CDCl}_3$ , ppm)  $\delta$  157.5, 151.8, 150.3, 147.2, 143.5, 137.1, 136.0, 129.5, 129.3, 128.8, 128.3, 127.8, 127.7, 127.7, 126.4, 126.1, 122.9, 119.1, 73.2, 60.7; HRMS (maldi,  $m/z$ ): calcd. for  $\text{C}_{20}\text{H}_{17}\text{N}_2\text{O}_2\text{Cl}$   $[\text{M}+\text{H}]^+$  351.0900, found 351.0899.

#### 2-((8'-amino-[2,2'-biquinolin]-3-yl)oxy)ethan-1-ol (**4h**)

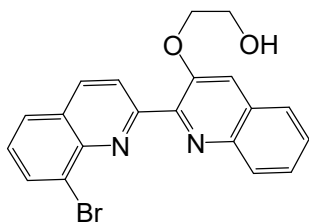

The reaction was conducted with 8-bromo-2-methylquinoline (**1h**, 133.2 mg, 0.6 mmol), 70%TBHP (84  $\mu$ L, 0.6 mmol) and aniline (**2a**, 18  $\mu$ L, 0.2 mmol). The residue was purified by column chromatography on silica gel (petroleum ether/EtOAc = 2:1) afforded the product **4h** as brown oil (35.4 mg, 45%).

$^1\text{H}$  NMR (400 MHz,  $\text{CDCl}_3$ , ppm)  $\delta$  8.33 (d,  $J$  = 8.4 Hz, 1H), 8.18-8.09 (m, 3H), 7.87 (d,  $J$  = 7.6 Hz, 1H), 7.80 (d,  $J$  = 7.6 Hz, 1H), 7.65-7.57 (m, 3H), 7.45 (t,  $J$  = 7.6 Hz, 1H), 4.34 (t,  $J$  = 4.4 Hz, 2H), 3.99 (t,  $J$  = 4.0 Hz, 2H);  $^{13}\text{C}$  NMR (100 MHz,  $\text{CDCl}_3$ , ppm)  $\delta$  157.8, 151.4, 150.3, 144.5, 143.1, 137.2, 133.5, 129.5, 129.3, 129.0, 127.7, 127.6, 127.3, 126.4, 125.1, 123.5, 115.7, 70.3, 61.0; HRMS (maldi,  $m/z$ ): calcd. for  $\text{C}_{20}\text{H}_{17}\text{N}_2\text{O}_2\text{Br}$   $[\text{M}+\text{H}]^+$  395.0395, found 395.0394.

#### 2-((2-(pyridin-2-yl)quinolin-3-yl)oxy)ethan-1-ol (**4i**)

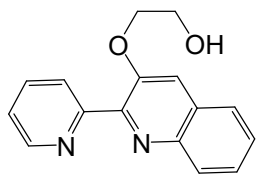

The reaction was conducted with 2-methylpyridine (**1i**, 59  $\mu$ L, 0.6 mmol), 70%TBHP (84  $\mu$ L, 0.6 mmol) and aniline (**2a**, 18  $\mu$ L, 0.2 mmol). The residue was purified by column chromatography on silica gel (petroleum ether/EtOAc = 2:1) afforded the product **4i** as yellow solid (26.5 mg, 41%), melting point (m.p.): 123.8-125.0  $^{\circ}$ C.

$^1\text{H}$  NMR (400 MHz,  $\text{CDCl}_3$ , ppm)  $\delta$  8.67 (d,  $J = 4.8$  1H), 8.13-8.08 (m, 2H), 7.96-7.92 (m, 1H), 7.78 (d,  $J = 7.6$  1H), 7.71 (s, 1H), 7.64-7.54 (m, 2H), 7.41 (t,  $J = 6.2$  1H), 4.48 (t,  $J = 4.4$  Hz, 2H), 3.94 (t,  $J = 4.2$  Hz, 2H);  $^{13}\text{C}$  NMR (100 MHz,  $\text{CDCl}_3$ , ppm)  $\delta$  156.5, 151.7, 150.6, 147.9, 143.5, 137.6, 129.5, 129.2, 127.6, 127.5, 126.4, 125.1, 123.6, 119.0, 73.5, 60.7; HRMS (maldi, m/z): calcd. for  $\text{C}_{16}\text{H}_{15}\text{N}_2\text{O}_2$   $[\text{M}+\text{H}]^+$  269.1290, found 269.1288.

#### 2-((2-(quinoxalin-2-yl)quinolin-3-yl)oxy)ethan-1-ol (**4j**)

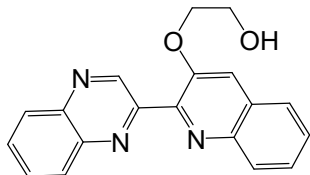

The reaction was conducted with 2-methylquinoxaline (**1j**, 77  $\mu$ L, 0.6 mmol), 70%TBHP (84  $\mu$ L, 0.6 mmol) and aniline (**2a**, 18  $\mu$ L, 0.2 mmol). The residue was purified by column chromatography on silica gel (petroleum ether/EtOAc = 2:1) afforded the product **4j** as yellow solid (18.2 mg, 30%), melting point (m.p.): 85.0-87.0  $^{\circ}$ C.

$^1\text{H}$  NMR (400 MHz,  $\text{CDCl}_3$ , ppm)  $\delta$  9.68 (s, 1H), 8.25-8.18 (m, 3H), 7.85-7.80 (m, 3H), 7.74 (s, 1H), 7.68-7.58 (m, 2H), 5.45 (brs, 1H), 4.50 (t,  $J = 4.4$  Hz, 2H), 4.03 (t,  $J = 4.0$  Hz, 2H);  $^{13}\text{C}$  NMR (100 MHz,  $\text{CDCl}_3$ , ppm)  $\delta$  152.2, 150.6, 147.9, 146.8, 143.6, 142.0, 140.7, 130.5, 129.8, 129.4, 129.3, 129.1, 128.2, 127.9, 126.4, 118.3, 72.6, 60.8; HRMS (maldi, m/z): calcd. for  $\text{C}_{19}\text{H}_{15}\text{N}_3\text{NaO}_2$   $[\text{M}+\text{Na}]^+$  340.1062, found 340.1056.

#### 2-((6-methyl-[2,2'-biquinolin]-3-yl)oxy)ethan-1-ol (**4k**)

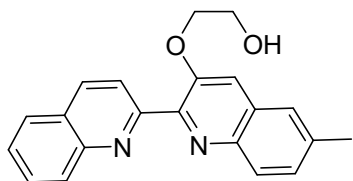

The reaction was conducted with 2-methylquinoline (**1a**, 80  $\mu$ L, 0.6 mmol), 70%TBHP (84  $\mu$ L, 0.6 mmol) and 4-methyl- benzenamine (**2b**, 21.4 mg, 0.2 mmol). The residue was purified by column chromatography on silica gel (petroleum ether/EtOAc = 1:1) afforded the product **4k** as yellow-brown oil (36.4 mg, 55%).

$^1\text{H}$  NMR (400 MHz,  $\text{CDCl}_3$ , ppm)  $\delta$  8.38 (d,  $J = 8.4$  Hz, 1H), 8.26 (d,  $J = 8.4$  Hz, 1H), 8.20 (d,  $J = 8.8$  Hz, 1H), 8.03 (d,  $J = 8.4$  Hz, 1H), 7.90 (d,  $J = 8.0$  Hz, 1H), 7.77 (t,  $J = 7.6$  Hz, 1H), 7.66 (s, 1H), 7.60 (t,  $J = 7.6$  Hz, 1H), 7.55 (s, 1H), 7.46 (dd,  $J = 1.6, 8.8$  Hz, 1H), 4.51 (t,  $J = 4.4$  Hz, 2H), 4.00 (t,  $J = 4.2$  Hz, 2H), 2.56 (s, 3H);  $^{13}\text{C}$  NMR (100 MHz,  $\text{CDCl}_3$ , ppm)  $\delta$  156.6, 152.0, 149.8, 146.9, 142.2, 137.8, 137.3, 130.0, 130.0, 129.3, 129.2, 128.8, 127.7, 127.6, 127.1, 125.3, 122.6, 118.6, 73.3, 60.7, 21.7; HRMS (maldi,  $m/z$ ): calcd. for  $\text{C}_{21}\text{H}_{19}\text{N}_2\text{O}_2$   $[\text{M}+\text{H}]^+$  331.1447, found 331.1445.

#### 2-((6-methoxy-[2,2'-biquinolin]-3-yl)oxy)ethan-1-ol (**4l**)

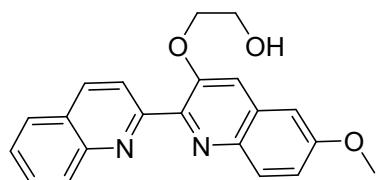

The reaction was conducted with 2-methylquinoline (**1a**, 80  $\mu$ L, 0.6 mmol), 70%TBHP (84  $\mu$ L, 0.6 mmol) and p-anisidine (**2c**, 24.6 mg, 0.2 mmol). The residue was purified by column chromatography on silica gel (petroleum ether/EtOAc = 1:1) afforded the product **4l** as reddish-brown oil (15.0 mg, 20%).

$^1\text{H}$  NMR (400 MHz,  $\text{CDCl}_3$ , ppm)  $\delta$  8.37 (d,  $J = 8.4$  Hz, 1H), 8.25 (d,  $J = 8.8$  Hz, 1H), 8.20 (d,  $J = 8.8$  Hz, 1H), 8.02 (d,  $J = 8.8$  Hz, 1H), 7.89 (d,  $J = 8.0$  Hz, 1H), 7.76 (t,  $J = 7.6$  Hz, 1H), 7.65 (s, 1H), 7.59 (t,  $J = 7.4$  Hz, 1H), 7.29 (d,  $J = 2.8$  Hz, 1H), 7.05 (d,  $J = 2.8$  Hz, 1H), 4.51 (t,  $J = 4.4$  Hz, 2H), 4.00 (t,  $J = 4.2$  Hz, 2H), 3.96 (s, 3H);  $^{13}\text{C}$  NMR (100 MHz,  $\text{CDCl}_3$ , ppm)  $\delta$  158.8, 156.6, 152.4, 148.0, 146.9, 139.6, 137.3, 131.0, 130.6, 130.0, 128.7, 127.7, 127.6, 127.0, 122.6, 120.4, 118.3, 104.0, 73.3, 60.7, 55.6; HRMS (maldi,  $m/z$ ): calcd. for  $\text{C}_{21}\text{H}_{19}\text{N}_2\text{O}_3$   $[\text{M}+\text{H}]^+$



347.1396, found 347.1395.

**2-((6-(tert-butyl)-[2,2'-biquinolin]-3-yl)oxy)ethan-1-ol (4m)**

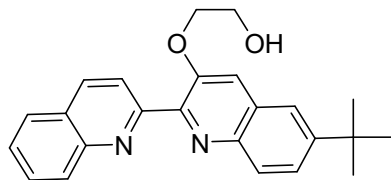

The reaction was conducted with 2-methylquinoline (**1a**, 80  $\mu$ L, 0.6 mmol), 70%TBHP (84  $\mu$ L, 0.6 mmol) and 4-tert-butylaniline (**2d**, 32  $\mu$ L, 0.2 mmol). The residue was purified by column chromatography on silica gel (petroleum ether/EtOAc = 1:1) afforded the product **4m** as yellow oil (34.4 mg, 46%).

$^1\text{H}$  NMR (400 MHz,  $\text{CDCl}_3$ , ppm)  $\delta$  8.38 (d,  $J = 8.4$  Hz, 1H), 8.26 (d,  $J = 8.4$  Hz, 1H), 8.20 (d,  $J = 8.4$  Hz, 1H), 8.08 (d,  $J = 8.8$  Hz, 1H), 7.90 (d,  $J = 8.0$  Hz, 1H), 7.79-7.71 (m, 4H), 7.60 (t,  $J = 7.6$  Hz, 1H), 6.65 (brs, 1H), 4.53 (t,  $J = 4.4$  Hz, 2H), 4.00 (t,  $J = 4.4$  Hz, 2H), 1.45 (s, 9H);  $^{13}\text{C}$  NMR (100 MHz,  $\text{CDCl}_3$ , ppm)  $\delta$  156.6, 151.9, 150.7, 150.1, 146.9, 142.2, 137.4, 130.0, 129.0, 128.8, 127.7, 127.6, 127.1, 126.8, 122.6, 121.5, 119.5, 73.4, 60.7, 35.1, 31.2; HRMS (maldi,  $m/z$ ): calcd. for  $\text{C}_{24}\text{H}_{25}\text{N}_2\text{O}_2$   $[\text{M}+\text{H}]^+$  373.1916, found 373.1915.

**2-((6-fluoro-[2,2'-biquinolin]-3-yl)oxy)ethan-1-ol (4n)**

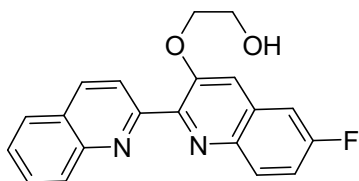

The reaction was conducted with 2-methylquinoline (**1a**, 80  $\mu$ L, 0.6 mmol), 70%TBHP (84  $\mu$ L, 0.6 mmol) and 4-fluoroaniline (**2e**, 19  $\mu$ L, 0.2 mmol). The residue was purified by column chromatography on silica gel (petroleum ether/EtOAc = 1:1) afforded the product **4n** as brown oil (36.0 mg, 54%).

$^1\text{H}$  NMR (400 MHz,  $\text{CDCl}_3$ , ppm)  $\delta$  8.39 (d,  $J = 8.8$  Hz, 1H), 8.25 (d,  $J = 8.8$  Hz, 1H), 8.18 (d,  $J = 8.8$  Hz, 1H), 8.15-8.11 (m, 1H), 7.90 (d,  $J = 8.0$  Hz, 1H), 7.78 (t,  $J = 7.6$  Hz, 1H), 7.67 (s, 1H), 7.61 (t,  $J = 7.4$  Hz, 1H), 7.40 (d,  $J = 8.4$  Hz, 2H), 4.51 (t,  $J = 4.4$  Hz, 2H), 4.01 (t,  $J = 4.4$  Hz, 2H);  $^{13}\text{C}$  NMR (100 MHz,  $\text{CDCl}_3$ , ppm)  $\delta$  161.9 (d,  $J = 247.7$  Hz), 156.2, 152.6, 150.1, 146.9,

140.5, 137.4, 132.1 (d,  $J = 9.8$  Hz), 130.2, 130.1, 128.8, 127.7, 1267.6, 127.2, 122.4, 118.2 (d,  $J = 5.3$  Hz), 117.8 (d,  $J = 25.6$  Hz), 109.5 (d,  $J = 22.1$  Hz), 73.3, 60.7; HRMS (maldi,  $m/z$ ): calcd. for  $C_{20}H_{16}N_2O_2F$   $[M+H]^+$  335.1196, found 335.1194.

#### 2-((6-chloro-[2,2'-biquinolin]-3-yl)oxy)ethan-1-ol (**4o**)

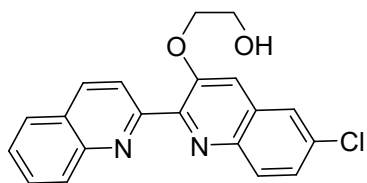

The reaction was conducted with 2-methylquinoline (**1a**, 80  $\mu$ L, 0.6 mmol), 70%TBHP (84  $\mu$ L, 0.6 mmol) and 4-chloroaniline (**2f**, 25.5 mg, 0.2 mmol). The residue was purified by column chromatography on silica gel (petroleum ether/EtOAc = 1:1) afforded the product **4o** as brown oil (26.8 mg, 38%).

$^1H$  NMR (400 MHz,  $CDCl_3$ , ppm)  $\delta$  8.38 (d,  $J = 8.4$  Hz, 1H), 8.25 (d,  $J = 8.4$  Hz, 1H), 8.18 (d,  $J = 8.4$  Hz, 1H), 8.06 (d,  $J = 8.8$  Hz, 1H), 7.90 (d,  $J = 8.0$  Hz, 1H), 7.79-7.76 (m, 2H), 7.63-7.59 (m, 2H), 7.55 (dd,  $J = 2.4, 9.2$  Hz, 1H), 4.50 (t,  $J = 4.2$  Hz, 2H), 4.00 (t,  $J = 4.4$  Hz, 2H);  $^{13}C$  NMR (100 MHz,  $CDCl_3$ , ppm)  $\delta$  156.1, 152.6, 151.0, 146.9, 141.7, 137.4, 133.5, 131.1, 130.2, 129.9, 128.8, 128.5, 127.8, 127.6, 127.3, 125.0, 122.4, 117.8, 73.3, 60.7; HRMS (maldi,  $m/z$ ): calcd. for  $C_{20}H_{16}N_2O_2Cl$   $[M+H]^+$  351.0900, found 351.0899.

#### 2-((8-methyl-[2,2'-biquinolin]-3-yl)oxy)ethan-1-ol (**4p**)

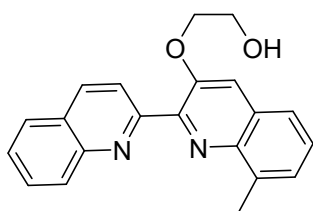

The reaction was conducted with 2-methylquinoline (**1a**, 80  $\mu$ L, 0.6 mmol), 70%TBHP (84  $\mu$ L, 0.6 mmol) and o-toluidine (**2g**, 21  $\mu$ L, 0.2 mmol). The residue was purified by column chromatography on silica gel (petroleum ether/EtOAc = 1:1) afforded the product **4p** as yellow-brown oil (24.8 mg, 35%).

$^1H$  NMR (400 MHz,  $CDCl_3$ , ppm)  $\delta$  8.38 (d,  $J = 8.4$  Hz, 1H), 8.32 (d,  $J = 8.8$  Hz, 1H), 8.27

(d,  $J = 8.4$  Hz, 1H), 7.90 (d,  $J = 8.0$  Hz, 1H), 7.77 (t,  $J = 7.2$  Hz, 1H), 7.73 (s, 1H), 7.64-7.58 (m, 2H), 7.48-7.43 (m, 2H), 4.54 (t,  $J = 4.4$  Hz, 2H), 4.03 (t,  $J = 4.4$  Hz, 2H), 2.84 (s, 3H);  $^{13}\text{C}$  NMR (100 MHz,  $\text{CDCl}_3$ , ppm)  $\delta$  156.9, 151.9, 148.9, 146.7, 142.6, 137.7, 137.1, 130.0, 129.3, 128.7, 127.8, 127.7, 127.5, 127.1, 124.4, 123.0, 119.6, 73.4, 60.7, 17.9; HRMS (maldi,  $m/z$ ): calcd. for  $\text{C}_{21}\text{H}_{19}\text{N}_2\text{O}_2$   $[\text{M}+\text{H}]^+$  331.1447, found 331.1445.

#### 2-((7-methyl-[2,2'-biquinolin]-3-yl)oxy)ethan-1-ol (**4q**)

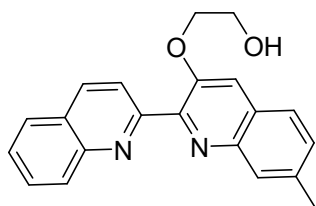

The reaction was conducted with 2-methylquinoline (**1a**, 80  $\mu\text{L}$ , 0.6 mmol), 70%TBHP (84  $\mu\text{L}$ , 0.6 mmol) and *m*-toluidine (**2h**, 21  $\mu\text{L}$ , 0.2 mmol). The residue was purified by column chromatography on silica gel (petroleum ether/EtOAc = 1:1) afforded the product **4q** as yellow-brown oil (35.6 mg, 54%).

$^1\text{H}$  NMR (400 MHz,  $\text{CDCl}_3$ , ppm)  $\delta$  8.36 (d,  $J = 8.4$  Hz, 1H), 8.26 (d,  $J = 8.8$  Hz, 1H), 8.19 (d,  $J = 8.8$  Hz, 1H), 7.92 (s, 1H), 7.88 (d,  $J = 8.0$  Hz, 1H), 7.76 (t,  $J = 7.2$  Hz, 1H), 7.70 (s, 1H), 7.67 (d,  $J = 8.4$  Hz, 1H), 7.59 (t,  $J = 7.6$  Hz, 1H), 7.39 (d,  $J = 8.4$  Hz, 1H), 4.50 (t,  $J = 4.4$  Hz, 2H), 3.99 (t,  $J = 4.2$  Hz, 2H), 2.55 (s, 3H);  $^{13}\text{C}$  NMR (100 MHz,  $\text{CDCl}_3$ , ppm)  $\delta$  156.6, 151.3, 150.5, 146.8, 143.7, 137.7, 137.3, 130.0, 129.9, 128.7, 128.5, 127.7, 127.5, 127.1, 127.0, 126.0, 122.6, 119.1, 73.2, 60.7, 21.6; HRMS (maldi,  $m/z$ ): calcd. for  $\text{C}_{21}\text{H}_{19}\text{N}_2\text{O}_2$   $[\text{M}+\text{H}]^+$  331.1447, found 331.1445.

#### 2-((6,8-dimethyl-[2,2'-biquinolin]-3-yl)oxy)ethan-1-ol (**4r**)

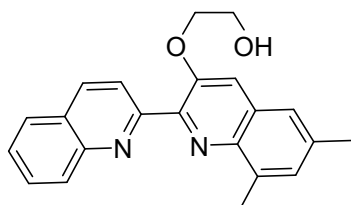

The reaction was conducted with 2-methylquinoline (**1a**, 80  $\mu\text{L}$ , 0.6 mmol), 70%TBHP (84  $\mu\text{L}$ , 0.6 mmol) and 2,4-dimethyl aniline (**2i**, 25  $\mu\text{L}$ , 0.2 mmol). The residue was purified by column

chromatography on silica gel (petroleum ether/EtOAc = 1:1) afforded the product **4r** as brown oil (21.7 mg, 32%).

<sup>1</sup>H NMR (400 MHz, CDCl<sub>3</sub>, ppm) δ 8.33 (q, *J* = 8.1 Hz, 2H), 8.27 (d, *J* = 8.4 Hz, 1H), 7.88 (d, *J* = 8.0 Hz, 1H), 7.75 (t, *J* = 7.2 Hz, 1H), 7.63 (s, 1H), 7.58 (t, *J* = 7.4 Hz, 1H), 7.38 (s, 1H), 7.31 (s, 1H), 6.93 (brs, 1H), 4.52 (t, *J* = 4.2 Hz, 2H), 4.02 (t, *J* = 4.2 Hz, 2H), 2.80 (s, 3H), 2.50 (s, 3H); <sup>13</sup>C NMR (100 MHz, CDCl<sub>3</sub>, ppm) δ 157.1, 152.0, 148.0, 146.8, 141.3, 137.6, 137.3, 137.0, 130.2, 129.9, 129.5, 128.7, 127.7, 127.5, 127.0, 123.2, 123.0, 119.1, 73.3, 60.7, 21.7, 17.8; HRMS (maldi, m/z): calcd. for C<sub>22</sub>H<sub>21</sub>N<sub>2</sub>O<sub>2</sub> [M+H]<sup>+</sup> 345.1603, found 345.1597.

#### 2-((2-(quinolin-2-yl)benzo[g]quinolin-3-yl)oxy)ethan-1-ol (**4s**)

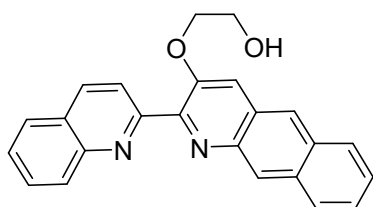

The reaction was conducted with 2-methylquinoline (**1a**, 80 μL, 0.6 mmol), 70%TBHP (84 μL, 0.6 mmol) and 2-naphthylamine (**2j**, 28.6 mg, 0.2 mmol). The residue was purified by column chromatography on silica gel (petroleum ether/EtOAc = 1:1) afforded the product **4s** as brown oil (28.8 mg, 41%).

<sup>1</sup>H NMR (400 MHz, CDCl<sub>3</sub>, ppm) δ 8.61-8.58 (m, 2H), 8.40 (d, *J* = 8.4 Hz, 1H), 8.29 (d, *J* = 8.4 Hz, 2H), 8.03 (d, *J* = 8.8 Hz, 1H), 7.97-7.90 (m, 3H), 7.78 (t, *J* = 7.6 Hz, 1H), 7.74-7.67 (m, 2H), 7.61 (t, *J* = 7.6 Hz, 1H), 4.66 (t, *J* = 3.6 Hz, 2H), 4.06 (t, *J* = 3.4 Hz, 2H); <sup>13</sup>C NMR (100 MHz, CDCl<sub>3</sub>, ppm) δ 156.5, 152.8, 149.0, 146.9, 142.9, 137.3, 132.3, 130.1, 129.1, 128.9, 128.8, 128.8, 128.0, 127.8, 127.7, 127.6, 127.2, 126.9, 126.8, 123.0, 122.7, 116.5, 74.0, 60.9; HRMS (maldi, m/z): calcd. for C<sub>24</sub>H<sub>19</sub>N<sub>2</sub>O<sub>2</sub> [M+H]<sup>+</sup> 367.1447, found 367.1446.

#### 2-((6'-bromo-6-fluoro-[2,2'-biquinolin]-3-yl)oxy)ethan-1-ol (**4t**)

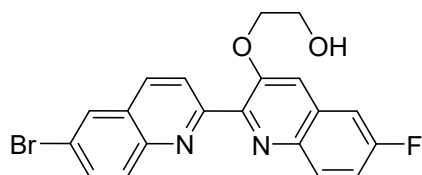

The reaction was conducted with 6-bromo-2-methylquinoline (**1f**, 133.2 mg, 0.6 mmol),

70%TBHP (84  $\mu$ L, 0.6 mmol) and 4-fluoroaniline (**2e**, 19  $\mu$ L, 0.2 mmol). The residue was purified by column chromatography on silica gel (petroleum ether/EtOAc = 2:1) afforded the product **4t** as brown solid (35.2 mg, 44%), melting point (m.p.): 171.6–173.0  $^{\circ}$ C.

$^1$ H NMR (400 MHz,  $\text{CDCl}_3$ , ppm)  $\delta$  8.29 (d,  $J$  = 8.8 Hz, 1H), 8.22 (d,  $J$  = 8.4 Hz, 1H), 8.12 (d,  $J$  = 9.2 Hz, 2H), 8.06 (d,  $J$  = 2.0 Hz, 1H), 7.83 (dd,  $J$  = 2.0, 8.8 Hz, 1H), 7.73-7.70 (m, 2H), 7.52 (dd,  $J$  = 2.0, 8.8 Hz, 1H), 6.22 (brs, 1H), 4.50 (t,  $J$  = 4.2 Hz, 2H), 4.00 (t,  $J$  = 4.0 Hz, 2H);  $^{13}$ C NMR (100 MHz,  $\text{CDCl}_3$ , ppm)  $\delta$  163.4 (d,  $J$  = 249.1 Hz), 157.5, 151.9, 150.4, 147.8 (d,  $J$  = 12.4 Hz), 143.6, 137.3, 129.6 (d,  $J$  = 9.9 Hz), 129.6, 129.3, 127.8 (d,  $J$  = 8.5 Hz), 126.4, 124.8, 122.0, 122.0, 119.2, 117.8 (d,  $J$  = 25.3 Hz), 112.6 (d,  $J$  = 20.7 Hz), 73.4, 60.7, 21.8; HRMS ( maldi, m/z ): calcd. for  $\text{C}_{20}\text{H}_{16}\text{N}_2\text{O}_2\text{BrF}$   $[\text{M}+\text{H}]^+$  413.0301, found 413.0300.

#### 2-((6'-bromo-7-fluoro-[2,2'-biquinolin]-3-yl)oxy)ethan-1-ol (**4u**)

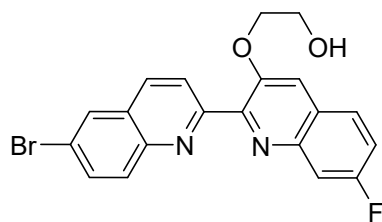

The reaction was conducted with 6-bromo-2-methylquinoline (**1f**, 133.2 mg, 0.6 mmol), 70%TBHP (84  $\mu$ L, 0.6 mmol) and 3-fluoroaniline (**2k**, 19  $\mu$ L, 0.2 mmol). The residue was purified by column chromatography on silica gel (petroleum ether/EtOAc = 2:1) afforded the product **4u** as brown solid (33.2 mg, 40%), melting point (m.p.): 183.0–185.1  $^{\circ}$ C.

$^1$ H NMR (400 MHz,  $\text{CDCl}_3$ , ppm)  $\delta$  8.29 (d,  $J$  = 8.8 Hz, 1H), 8.23 (d,  $J$  = 8.4 Hz, 1H), 8.14-8.10 (m, 2H), 8.06 (d,  $J$  = 2.0 Hz, 1H), 7.83 (dd,  $J$  = 2.4, 9.0 Hz, 1H), 7.67 (s, 1H), 7.42-7.38 (m, 2H), 6.22 (s, 1H), 4.50 (t,  $J$  = 4.4 Hz, 2H), 4.00 (t,  $J$  = 4.2 Hz, 2H);  $^{13}$ C NMR (100 MHz,  $\text{CDCl}_3$ , ppm)  $\delta$  161.9 (d,  $J$  = 246.7 Hz), 156.6, 151.5, 151.1, 145.5, 144.1 (d,  $J$  = 12.2 Hz), 136.3, 133.6, 130.6, 129.7, 128.9, 128.1 (d,  $J$  = 9.5 Hz), 126.2, 123.5, 121.3, 119.3, 118.4 (d,  $J$  = 25.4 Hz), 113.2 (d,  $J$  = 20.4 Hz), 73.3, 60.7; HRMS ( maldi, m/z ): calcd. for  $\text{C}_{20}\text{H}_{16}\text{N}_2\text{O}_2\text{BrF}$   $[\text{M}+\text{H}]^+$  413.0301, found 413.0301.

#### 3-(2-bromoethoxy)-2,2'-biquinoline (**4ab**):

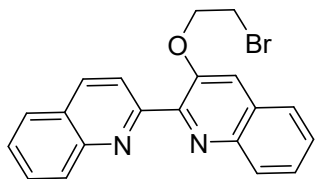

$^1\text{H}$  NMR (400 MHz,  $\text{CDCl}_3$ , ppm)  $\delta$  8.29 (d,  $J = 8.4$ , 2H), 8.23 (d,  $J = 8.4$  Hz, 1H), 8.02 (d,  $J = 8.8$  1H), 7.89 (d,  $J = 8.0$  Hz, 1H), 7.79-7.74 (m, 2H), 7.64-7.54 (m, 4H), 4.46 (t,  $J = 6.2$  Hz, 2H), 3.62 (t,  $J = 6.0$  Hz, 2H);  $^{13}\text{C}$  NMR (100 MHz,  $\text{CDCl}_3$ , ppm)  $\delta$  155.9, 151.2, 150.3, 148.1, 143.5, 135.8, 130.1, 129.9, 129.5, 128.9, 127.7, 127.6, 127.5, 127.5, 126.9, 126.3, 122.8, 115.6, 68.7, 28.6; MS (maldi, m/z): calcd. for  $\text{C}_{20}\text{H}_{16}\text{BrN}_2\text{O}$   $[\text{M}+\text{H}]^+$  379.0446, found 379.0337.

## References

[1] (a) A. Martins and M. Lautens, A Palladium-Catalyzed approach to polycyclic sulfur heterocycles, *J. Org. Chem.*, 2008, **73**, 8705 – 8710; (b) A. C. Kruegel, S. Rakshit, X. Li, and D. Sames, Constructing iboga alkaloids via C–H bond functionalization: examination of the direct and catalytic union of heteroarenes and isoquinuclidine Alkenes, *J. Org. Chem.*, 2015, **80**, 2062–2071.

## Crystal data and structure refinement for 4j

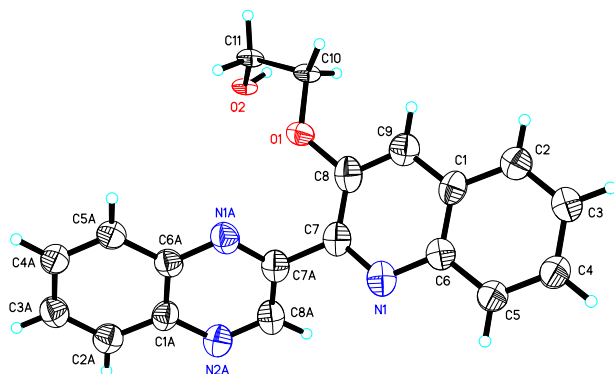

mo\_ddz20083\_0m CCDC 2101003

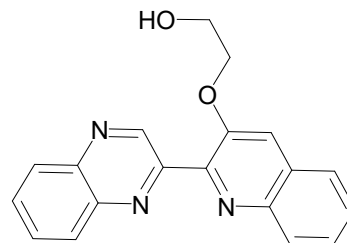

4j

Table 1. Crystal data and structure refinement for 4j.

|                                 |                                                               |                  |
|---------------------------------|---------------------------------------------------------------|------------------|
| Identification code             | mo_ddz20083_0m                                                |                  |
| Empirical formula               | C <sub>19</sub> H <sub>15</sub> N <sub>3</sub> O <sub>2</sub> |                  |
| Formula weight                  | 317.34                                                        |                  |
| Temperature                     | 293(2) K                                                      |                  |
| Wavelength                      | 0.71073 Å                                                     |                  |
| Crystal system                  | Monoclinic                                                    |                  |
| Space group                     | C 2/c                                                         |                  |
| Unit cell dimensions            | a = 22.630(7) Å                                               | α = 90° .        |
|                                 | b = 3.8102(11) Å                                              | β = 99.852(8)° . |
|                                 | c = 18.998(6) Å                                               | γ = 90° .        |
| Volume                          | 1613.9(8) Å <sup>3</sup>                                      |                  |
| Z                               | 4                                                             |                  |
| Density (calculated)            | 1.306 Mg/m <sup>3</sup>                                       |                  |
| Absorption coefficient          | 0.087 mm <sup>-1</sup>                                        |                  |
| F(000)                          | 664                                                           |                  |
| Crystal size                    | 0.150 x 0.100 x 0.050 mm <sup>3</sup>                         |                  |
| Theta range for data collection | 2.591 to 24.996° .                                            |                  |
| Index ranges                    | -26 ≤ h ≤ 25, -4 ≤ k ≤ 4, -22 ≤ l ≤ 22                        |                  |
| Reflections collected           | 9644                                                          |                  |
| Independent reflections         | 1428 [R(int) = 0.0572]                                        |                  |
| Completeness to theta = 25.242° | 97.1 %                                                        |                  |
| Absorption correction           | Semi-empirical from equivalents                               |                  |
| Max. and min. transmission      | 0.7456 and 0.6177                                             |                  |
| Refinement method               | Full-matrix least-squares on F <sup>2</sup>                   |                  |
| Data / restraints / parameters  | 1428 / 73 / 157                                               |                  |

|                                      |                                        |
|--------------------------------------|----------------------------------------|
| Goodness-of-fit on $F^2$             | 1.389                                  |
| Final R indices [ $I > 2\sigma(I)$ ] | $R1 = 0.1168$ , $wR2 = 0.3369$         |
| R indices (all data)                 | $R1 = 0.1616$ , $wR2 = 0.3829$         |
| Extinction coefficient               | 0.026(10)                              |
| Largest diff. peak and hole          | 0.685 and $-0.384 \text{ e. \AA}^{-3}$ |

Table 2. Atomic coordinates ( $\times 10^4$ ) and equivalent isotropic displacement parameters ( $\text{\AA}^2 \times 10^3$ )

for mo\_ddz20083\_0m.  $U(\text{eq})$  is defined as one third of the trace of the orthogonalized  $U^{ij}$  tensor.

|        | x        | y         | z        | $U(\text{eq})$ |
|--------|----------|-----------|----------|----------------|
| O(1)   | 4743(3)  | 3312(17)  | 3687(3)  | 63(2)          |
| N(2)   | 5786(2)  | 1795(12)  | 3954(3)  | 75(2)          |
| N(1)   | 5766(2)  | -741(10)  | 2567(2)  | 72(1)          |
| C(1)   | 6298(2)  | 397(12)   | 3766(3)  | 67(1)          |
| C(2)   | 6840(2)  | 240(13)   | 4257(3)  | 74(2)          |
| C(3)   | 7342(2)  | -1146(13) | 4049(3)  | 74(2)          |
| C(4)   | 7324(2)  | -2350(13) | 3349(3)  | 73(2)          |
| C(5)   | 6805(2)  | -2253(13) | 2867(3)  | 67(2)          |
| C(6)   | 6278(2)  | -834(11)  | 3058(3)  | 62(1)          |
| C(7)   | 5279(2)  | 544(12)   | 2769(3)  | 66(2)          |
| C(8)   | 5286(2)  | 1911(14)  | 3468(3)  | 74(2)          |
| C(9)   | 5786(2)  | 1795(12)  | 3954(3)  | 75(2)          |
| O(2)   | 3978(4)  | 9210(20)  | 3798(4)  | 36(2)          |
| C(10)  | 4695(5)  | 5210(30)  | 4332(6)  | 38(2)          |
| C(11)  | 4083(4)  | 6220(30)  | 4262(5)  | 37(2)          |
| O(2')  | 3957(5)  | 7110(30)  | 4040(5)  | 38(2)          |
| C(10') | 4741(8)  | 3980(50)  | 4430(7)  | 38(2)          |
| C(11') | 4100(11) | 4520(80)  | 4490(16) | 38(2)          |

Table 3. Bond lengths [ $\text{\AA}$ ] and angles [ $^\circ$ ] for mo\_ddz20083\_0m.

|             |           |
|-------------|-----------|
| O(1)-C(10') | 1.435(14) |
| O(1)-C(10)  | 1.442(11) |
| O(1)-C(8)   | 1.462(8)  |



|                  |             |
|------------------|-------------|
| N(2)-C(8)        | 1. 333 (7)  |
| N(2)-C(1)        | 1. 378 (7)  |
| N(1)-C(7)        | 1. 322 (6)  |
| N(1)-C(6)        | 1. 359 (6)  |
| C(1)-C(2)        | 1. 410 (7)  |
| C(1)-C(6)        | 1. 417 (7)  |
| C(2)-C(3)        | 1. 370 (7)  |
| C(2)-H(2)        | 0. 9300     |
| C(3)-C(4)        | 1. 401 (7)  |
| C(3)-H(3)        | 0. 9300     |
| C(4)-C(5)        | 1. 360 (6)  |
| C(4)-H(4)        | 0. 9300     |
| C(5)-C(6)        | 1. 413 (6)  |
| C(5)-H(5)        | 0. 9300     |
| C(7)-C(8)        | 1. 424 (8)  |
| C(7)-C(7) #1     | 1. 483 (9)  |
| O(2)-C(11)       | 1. 434 (10) |
| O(2)-H(2A)       | 0. 8200     |
| C(10)-C(11)      | 1. 423 (13) |
| C(10)-H(10A)     | 0. 9700     |
| C(10)-H(10B)     | 0. 9700     |
| C(11)-H(11A)     | 0. 9700     |
| C(11)-H(11B)     | 0. 9700     |
| O(2')-C(11')     | 1. 310 (18) |
| O(2')-H(2')      | 0. 8200     |
| C(10')-C(11')    | 1. 489 (18) |
| C(10')-H(10C)    | 0. 9700     |
| C(10')-H(10D)    | 0. 9700     |
| C(11')-H(11C)    | 0. 9700     |
| C(11')-H(11D)    | 0. 9700     |
|                  |             |
| C(10')-O(1)-C(8) | 119. 3 (7)  |
| C(10)-O(1)-C(8)  | 127. 8 (6)  |
| C(8)-N(2)-C(1)   | 119. 0 (5)  |
| C(7)-N(1)-C(6)   | 117. 8 (5)  |
| N(2)-C(1)-C(2)   | 121. 4 (5)  |
| N(2)-C(1)-C(6)   | 118. 9 (5)  |
| C(2)-C(1)-C(6)   | 119. 7 (5)  |

|                      |           |
|----------------------|-----------|
| C(3)-C(2)-C(1)       | 119.7(5)  |
| C(3)-C(2)-H(2)       | 120.1     |
| C(1)-C(2)-H(2)       | 120.1     |
| C(2)-C(3)-C(4)       | 120.6(5)  |
| C(2)-C(3)-H(3)       | 119.7     |
| C(4)-C(3)-H(3)       | 119.7     |
| C(5)-C(4)-C(3)       | 120.7(4)  |
| C(5)-C(4)-H(4)       | 119.6     |
| C(3)-C(4)-H(4)       | 119.6     |
| C(4)-C(5)-C(6)       | 120.5(5)  |
| C(4)-C(5)-H(5)       | 119.8     |
| C(6)-C(5)-H(5)       | 119.8     |
| N(1)-C(6)-C(5)       | 119.5(5)  |
| N(1)-C(6)-C(1)       | 121.8(4)  |
| C(5)-C(6)-C(1)       | 118.7(4)  |
| N(1)-C(7)-C(8)       | 122.0(5)  |
| N(1)-C(7)-C(7)#1     | 116.9(6)  |
| C(8)-C(7)-C(7)#1     | 121.1(5)  |
| N(2)-C(8)-C(7)       | 120.4(5)  |
| N(2)-C(8)-O(1)       | 118.0(5)  |
| C(7)-C(8)-O(1)       | 121.5(5)  |
| C(11)-O(2)-H(2A)     | 109.5     |
| C(11)-C(10)-O(1)     | 105.7(9)  |
| C(11)-C(10)-H(10A)   | 110.6     |
| O(1)-C(10)-H(10A)    | 110.6     |
| C(11)-C(10)-H(10B)   | 110.6     |
| O(1)-C(10)-H(10B)    | 110.6     |
| H(10A)-C(10)-H(10B)  | 108.7     |
| C(10)-C(11)-O(2)     | 109.1(9)  |
| C(10)-C(11)-H(11A)   | 109.9     |
| O(2)-C(11)-H(11A)    | 109.9     |
| C(10)-C(11)-H(11B)   | 109.9     |
| O(2)-C(11)-H(11B)    | 109.9     |
| H(11A)-C(11)-H(11B)  | 108.3     |
| C(11')-O(2')-H(2')   | 109.5     |
| O(1)-C(10')-C(11')   | 105.5(16) |
| O(1)-C(10')-H(10C)   | 110.6     |
| C(11')-C(10')-H(10C) | 110.7     |

|                      |           |
|----------------------|-----------|
| O(1)-C(10')-H(10D)   | 110.6     |
| C(11')-C(10')-H(10D) | 110.6     |
| H(10C)-C(10')-H(10D) | 108.8     |
| O(2')-C(11')-C(10')  | 100.8(15) |
| O(2')-C(11')-H(11C)  | 111.6     |
| C(10')-C(11')-H(11C) | 111.6     |
| O(2')-C(11')-H(11D)  | 111.6     |
| C(10')-C(11')-H(11D) | 111.6     |
| H(11C)-C(11')-H(11D) | 109.4     |

---

Symmetry transformations used to generate equivalent atoms:

#1  $-x+1, y, -z+1/2$

Table 4. Anisotropic displacement parameters ( $\text{\AA}^2 \times 10^3$ ) for mo\_ddz20083\_0m. The anisotropic

displacement factor exponent takes the form:  $-2\pi^2 [ h^2 a^{*2} U^{11} + \dots + 2 h k a^* b^* U^{12} ]$

---

|        | U <sup>11</sup> | U <sup>22</sup> | U <sup>33</sup> | U <sup>23</sup> | U <sup>13</sup> | U <sup>12</sup> |
|--------|-----------------|-----------------|-----------------|-----------------|-----------------|-----------------|
| O(1)   | 67(4)           | 75(4)           | 47(3)           | -11(3)          | 8(3)            | 2(3)            |
| N(2)   | 72(3)           | 63(3)           | 88(3)           | -7(2)           | 14(2)           | 2(2)            |
| N(1)   | 67(3)           | 63(3)           | 84(3)           | 18(2)           | 5(2)            | -2(2)           |
| C(1)   | 58(3)           | 56(3)           | 89(4)           | 11(2)           | 18(2)           | -2(2)           |
| C(2)   | 76(3)           | 66(3)           | 79(3)           | 1(3)            | 14(3)           | -6(3)           |
| C(3)   | 70(3)           | 71(4)           | 78(3)           | 5(3)            | 4(2)            | -3(2)           |
| C(4)   | 67(3)           | 76(4)           | 77(3)           | 8(3)            | 17(3)           | 6(2)            |
| C(5)   | 69(3)           | 66(3)           | 66(3)           | 9(2)            | 13(2)           | 2(2)            |
| C(6)   | 65(3)           | 51(3)           | 69(3)           | 13(2)           | 9(2)            | -4(2)           |
| C(7)   | 62(3)           | 46(3)           | 89(4)           | 5(2)            | 7(2)            | -1(2)           |
| C(8)   | 64(3)           | 54(3)           | 102(4)          | 3(3)            | 2(3)            | -3(2)           |
| C(9)   | 72(3)           | 63(3)           | 88(3)           | -7(2)           | 14(2)           | 2(2)            |
| O(2)   | 58(3)           | 27(4)           | 22(3)           | 13(3)           | 7(2)            | 19(3)           |
| C(10)  | 61(3)           | 28(4)           | 25(3)           | 15(3)           | 6(2)            | 20(3)           |
| C(11)  | 60(3)           | 27(4)           | 24(3)           | 15(3)           | 6(2)            | 20(3)           |
| O(2')  | 60(3)           | 29(4)           | 24(3)           | 13(3)           | 7(2)            | 19(3)           |
| C(10') | 61(3)           | 28(4)           | 25(3)           | 15(3)           | 6(2)            | 20(3)           |
| C(11') | 61(3)           | 28(4)           | 25(3)           | 14(3)           | 6(2)            | 20(3)           |

---

---

Table 5. Hydrogen coordinates (  $\times 10^4$ ) and isotropic displacement parameters ( $\text{\AA}^2 \times 10^{-3}$ )

for mo\_ddz20083\_0m.

|        | x    | y     | z    | U(eq) |
|--------|------|-------|------|-------|
| H(2)   | 6858 | 1076  | 4720 | 88    |
| H(3)   | 7698 | -1290 | 4376 | 89    |
| H(4)   | 7671 | -3225 | 3212 | 88    |
| H(5)   | 6798 | -3128 | 2409 | 80    |
| H(9)   | 5788 | 2646  | 4413 | 90    |
| H(2A)  | 4149 | 10924 | 3999 | 53    |
| H(10A) | 4809 | 3721  | 4748 | 46    |
| H(10B) | 4953 | 7256  | 4380 | 46    |
| H(11A) | 3988 | 6802  | 4727 | 45    |
| H(11B) | 3826 | 4293  | 4065 | 45    |
| H(2')  | 4259 | 8240  | 4005 | 57    |
| H(10C) | 4975 | 6062  | 4586 | 46    |
| H(10D) | 4908 | 2007  | 4719 | 46    |
| H(11C) | 3862 | 2437  | 4346 | 45    |
| H(11D) | 4055 | 5170  | 4971 | 45    |

Table 6. Torsion angles [ $^\circ$ ] for mo\_ddz20083\_0m.

|                     |           |
|---------------------|-----------|
| C(8)-N(2)-C(1)-C(2) | 179.4(4)  |
| C(8)-N(2)-C(1)-C(6) | 0.8(7)    |
| N(2)-C(1)-C(2)-C(3) | -179.6(5) |
| C(6)-C(1)-C(2)-C(3) | -0.9(7)   |
| C(1)-C(2)-C(3)-C(4) | 1.2(8)    |
| C(2)-C(3)-C(4)-C(5) | -1.8(8)   |
| C(3)-C(4)-C(5)-C(6) | 2.0(7)    |
| C(7)-N(1)-C(6)-C(5) | 178.7(4)  |
| C(7)-N(1)-C(6)-C(1) | 0.0(6)    |
| C(4)-C(5)-C(6)-N(1) | 179.5(4)  |
| C(4)-C(5)-C(6)-C(1) | -1.7(7)   |
| N(2)-C(1)-C(6)-N(1) | -1.5(7)   |

|                          |            |
|--------------------------|------------|
| C(2)-C(1)-C(6)-N(1)      | 179.9(4)   |
| N(2)-C(1)-C(6)-C(5)      | 179.8(4)   |
| C(2)-C(1)-C(6)-C(5)      | 1.1(7)     |
| C(6)-N(1)-C(7)-C(8)      | 2.1(7)     |
| C(6)-N(1)-C(7)-C(7)#1    | -178.6(3)  |
| C(1)-N(2)-C(8)-C(7)      | 1.3(7)     |
| C(1)-N(2)-C(8)-O(1)      | 178.2(5)   |
| N(1)-C(7)-C(8)-N(2)      | -2.8(8)    |
| C(7)#1-C(7)-C(8)-N(2)    | 177.9(4)   |
| N(1)-C(7)-C(8)-O(1)      | -179.7(5)  |
| C(7)#1-C(7)-C(8)-O(1)    | 1.1(7)     |
| C(10')-O(1)-C(8)-N(2)    | -9.7(12)   |
| C(10)-O(1)-C(8)-N(2)     | 12.4(11)   |
| C(10')-O(1)-C(8)-C(7)    | 167.2(10)  |
| C(10)-O(1)-C(8)-C(7)     | -170.6(7)  |
| C(10')-O(1)-C(10)-C(11)  | -113(3)    |
| C(8)-O(1)-C(10)-C(11)    | 175.5(7)   |
| O(1)-C(10)-C(11)-O(2)    | -78.3(11)  |
| C(10)-O(1)-C(10')-C(11') | 73(3)      |
| C(8)-O(1)-C(10')-C(11')  | -166.5(13) |
| O(1)-C(10')-C(11')-O(2') | -57(2)     |

---

Symmetry transformations used to generate equivalent atoms:

#1  $-x+1, y, -z+1/2$

Table 7. Hydrogen bonds for mo\_ddz20083\_0m [ $\text{\AA}$  and  $^\circ$ ].

| D-H...A               | d(D-H) | d(H...A) | d(D...A)  | $\angle$ (DHA) |
|-----------------------|--------|----------|-----------|----------------|
| C(11)-H(11A)...N(2)#2 | 0.97   | 2.53     | 3.435(11) | 156.0          |
| O(2)-H(2A)...O(1)#3   | 0.82   | 1.81     | 2.369(11) | 124.6          |
| C(11)-H(11A)...N(2)#2 | 0.97   | 2.53     | 3.435(11) | 156.0          |
| O(2)-H(2A)...O(1)#3   | 0.82   | 1.81     | 2.369(11) | 124.6          |

---

Symmetry transformations used to generate equivalent atoms:

#1  $-x+1, y, -z+1/2$     #2  $-x+1, -y+1, -z+1$     #3  $x, y+1, z$

# <sup>1</sup>H NMR and <sup>13</sup>C NMR spectra

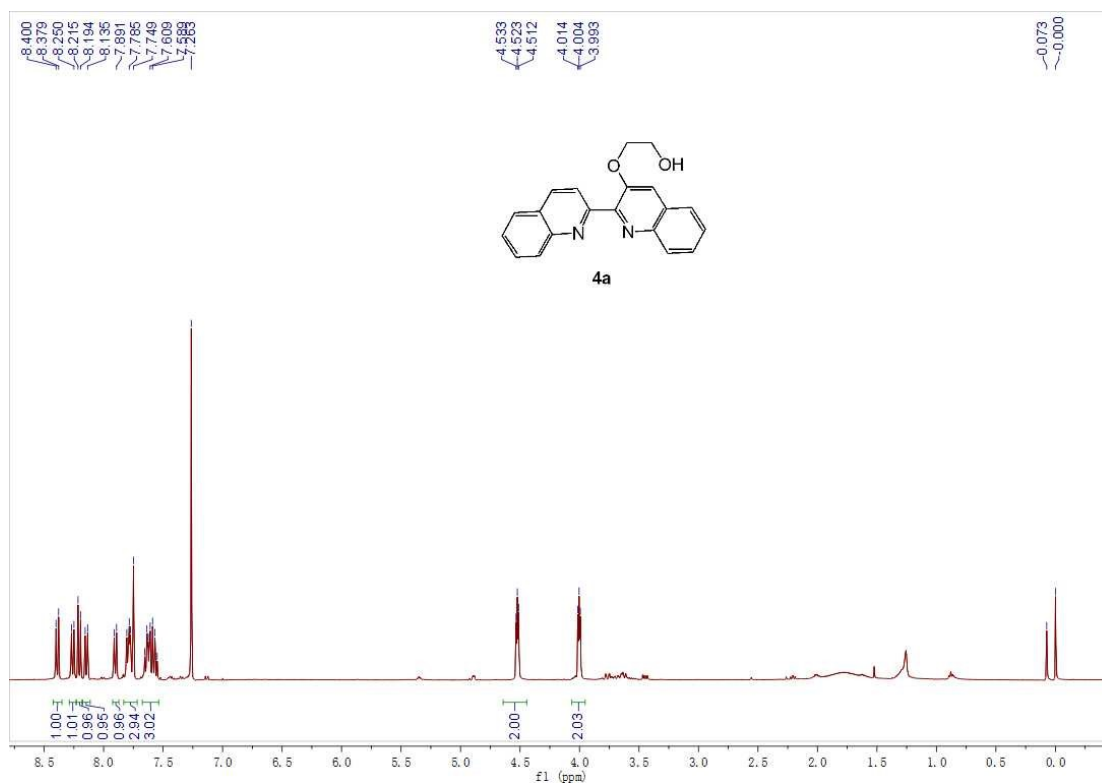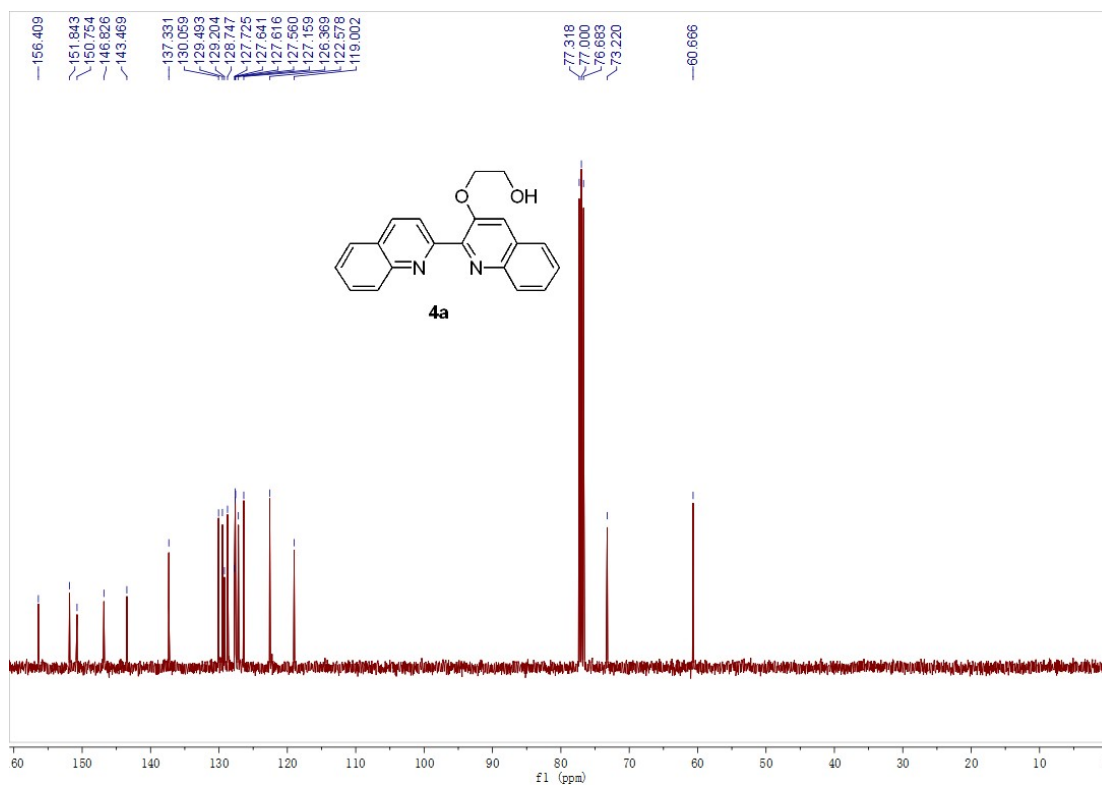

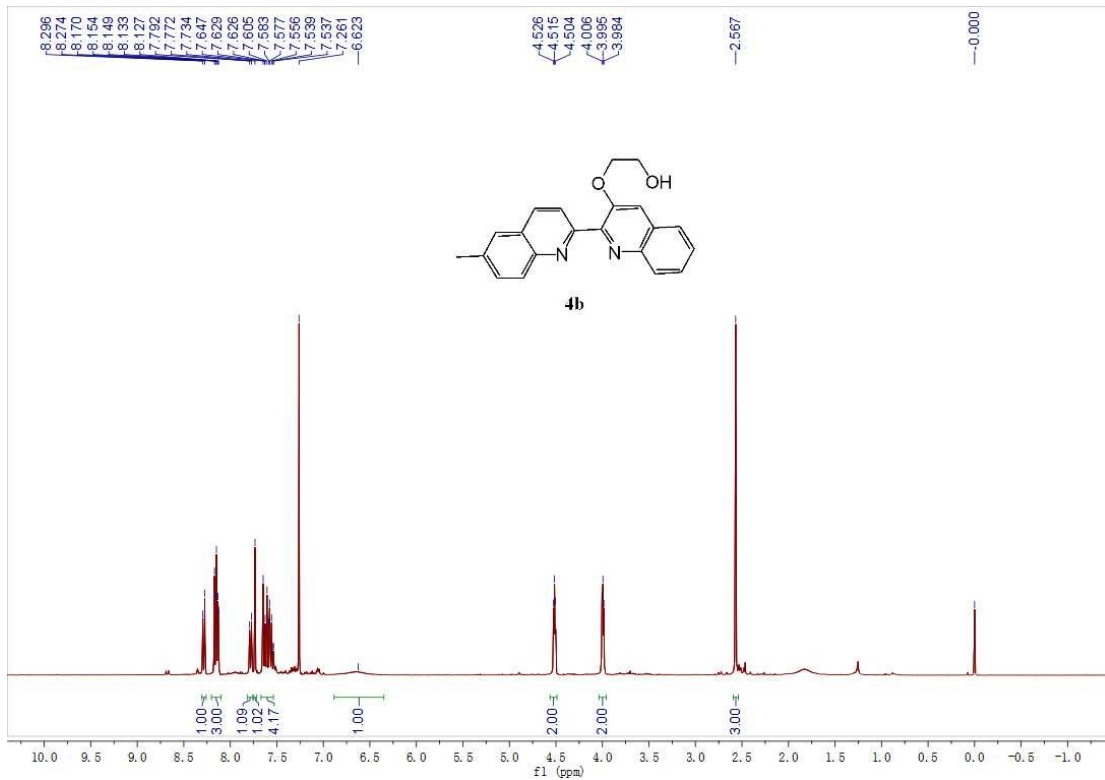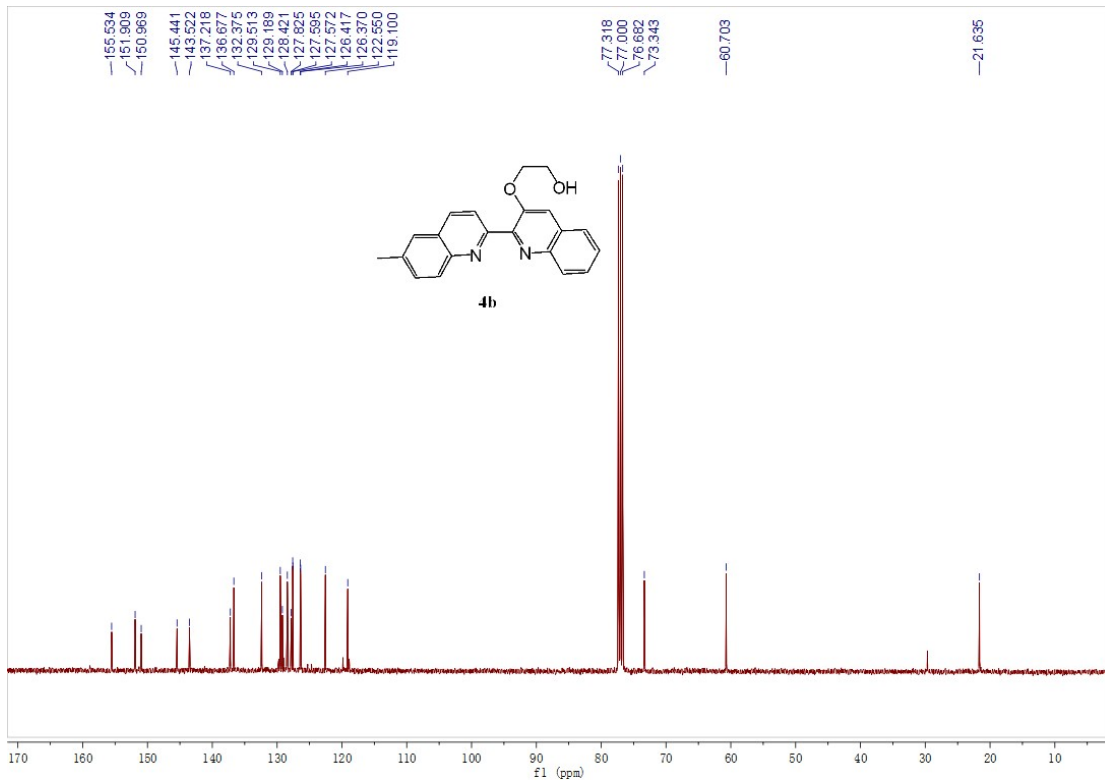



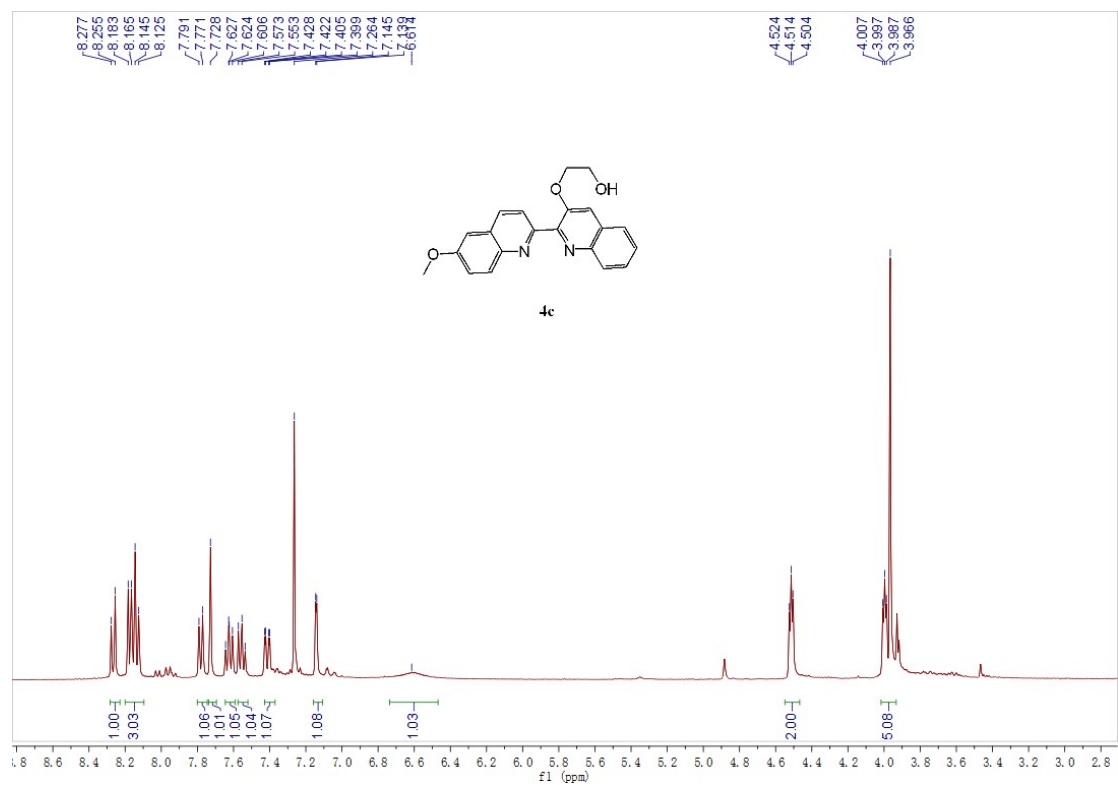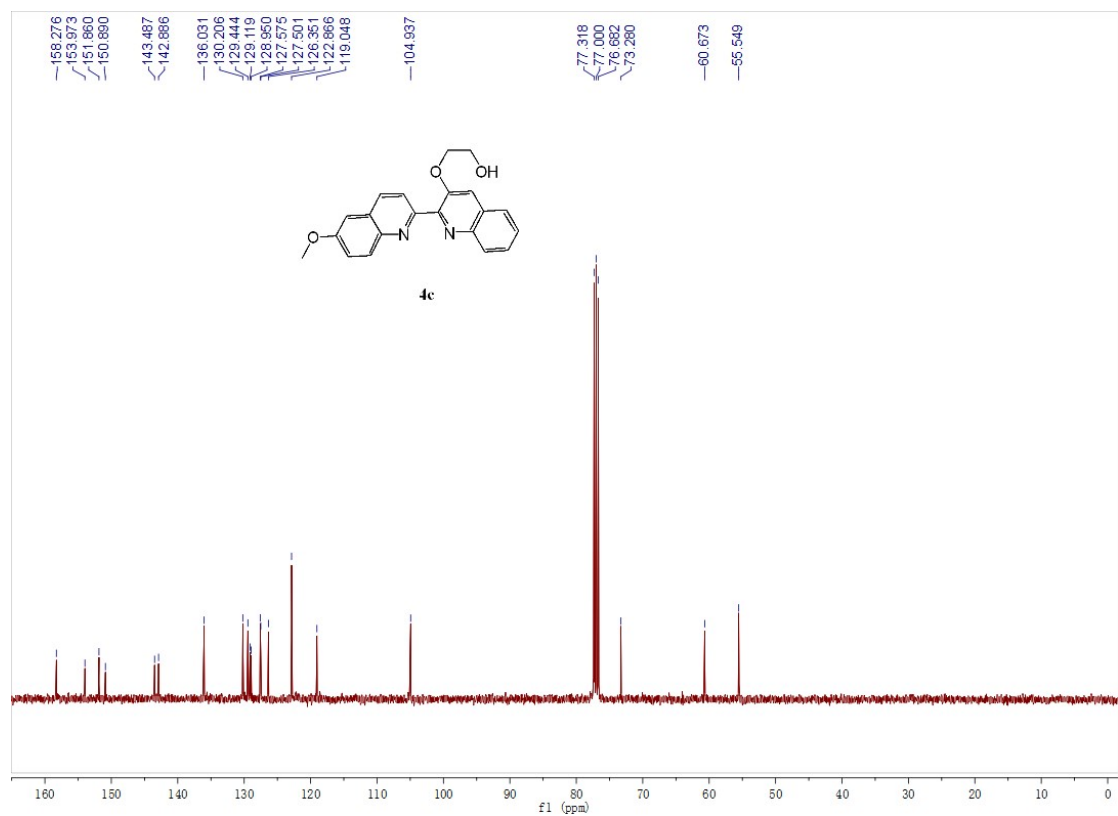

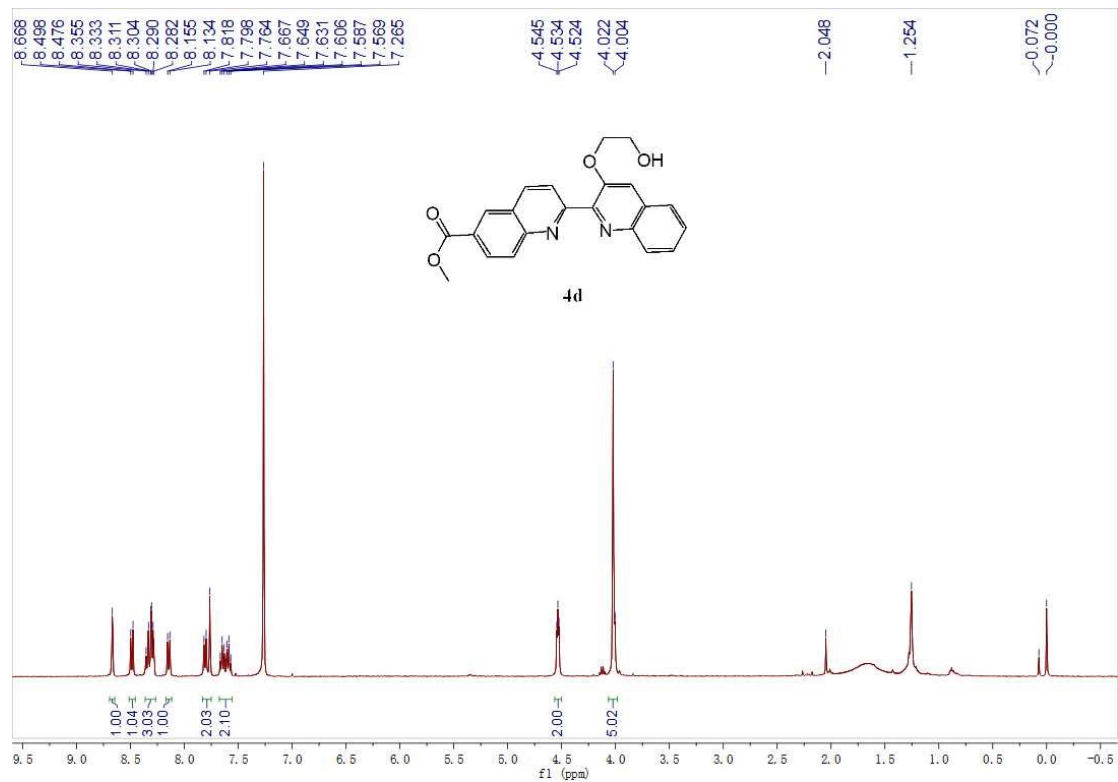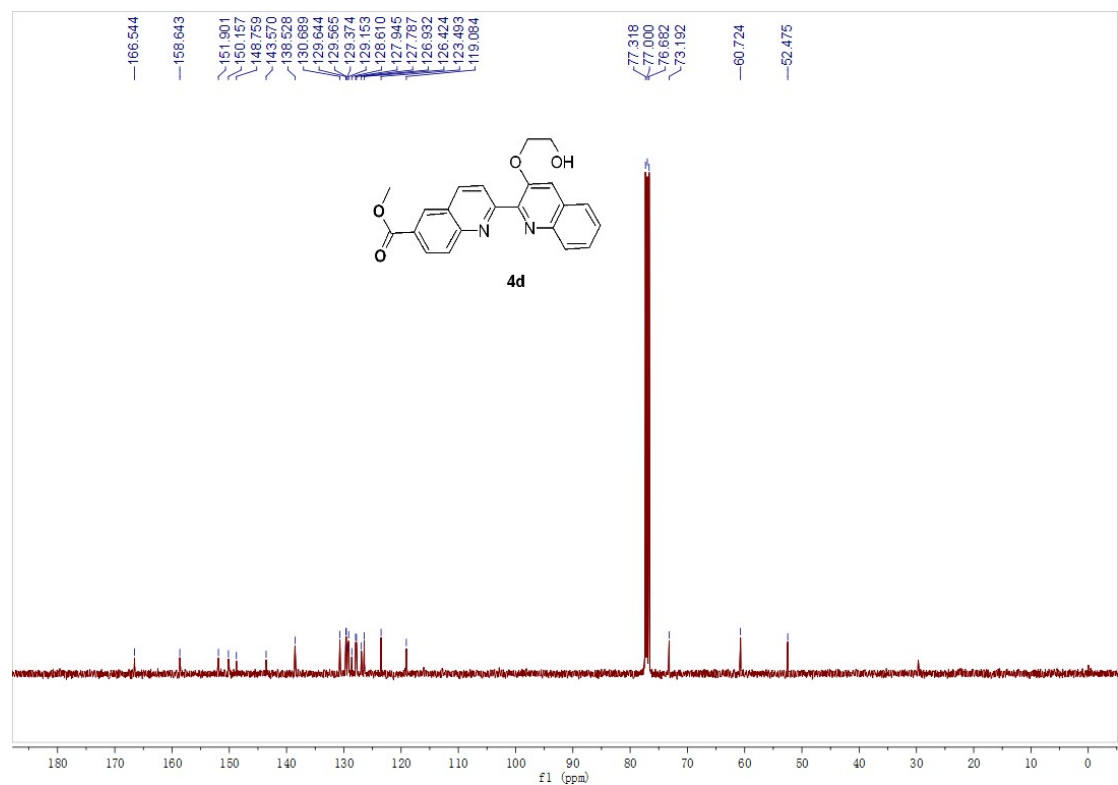

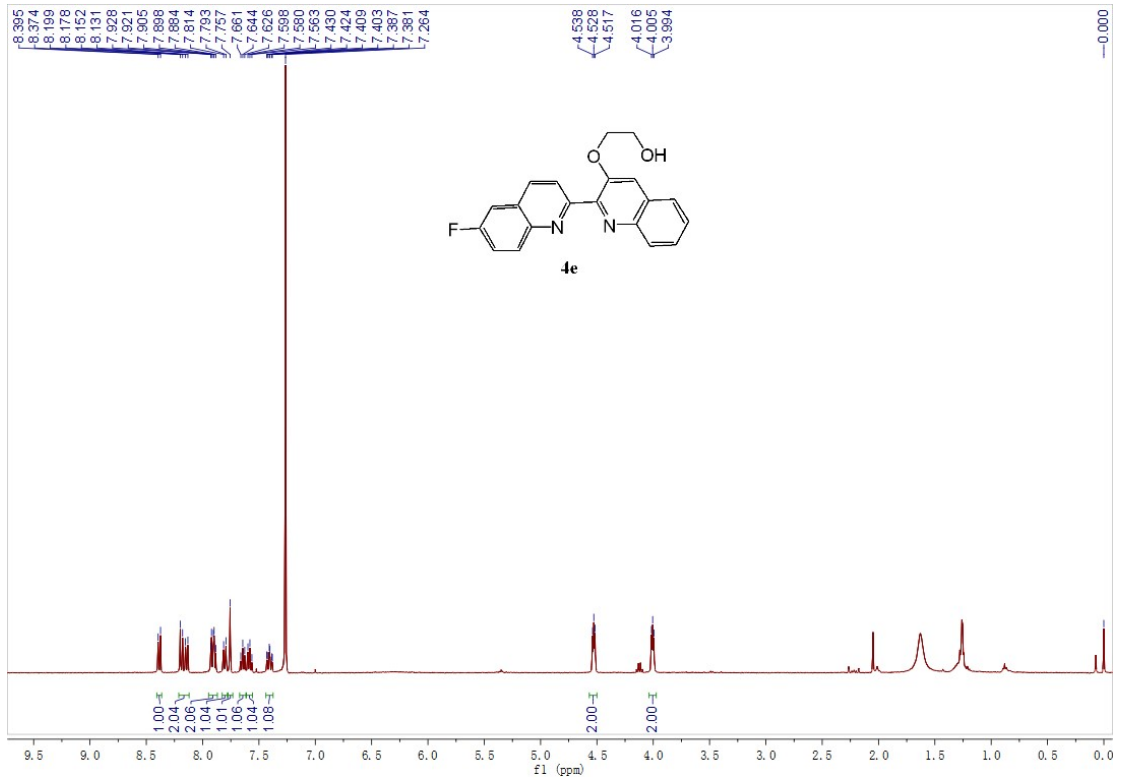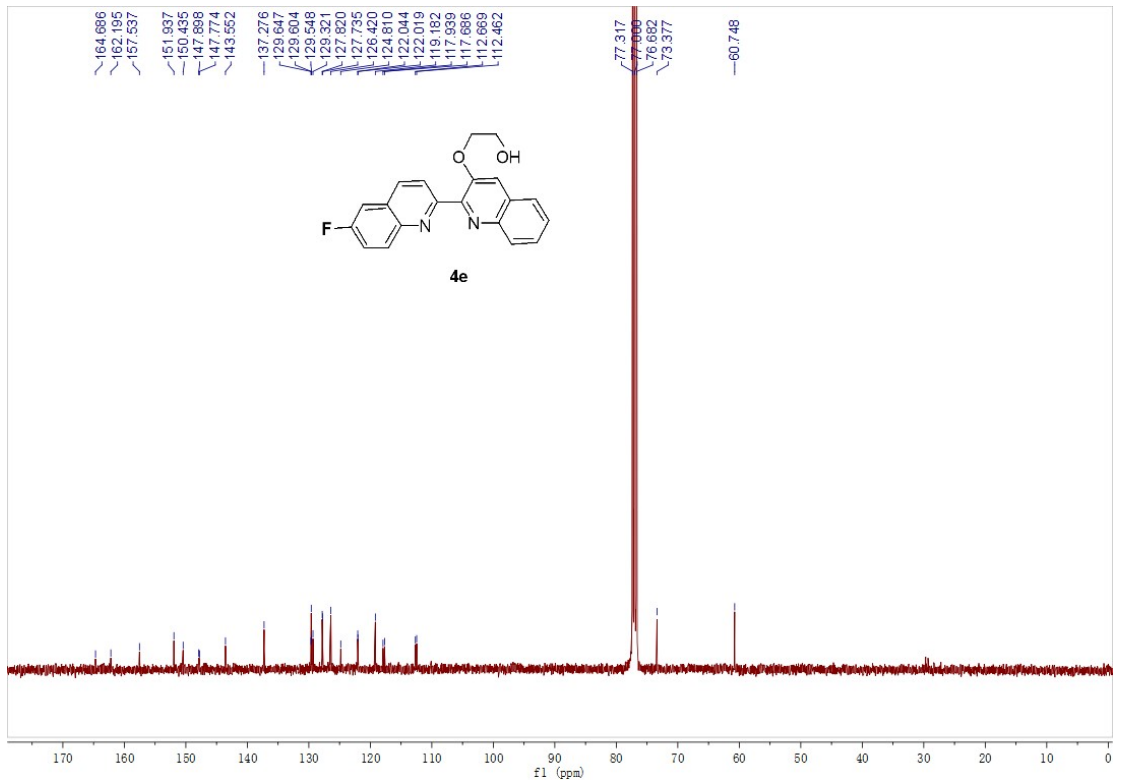

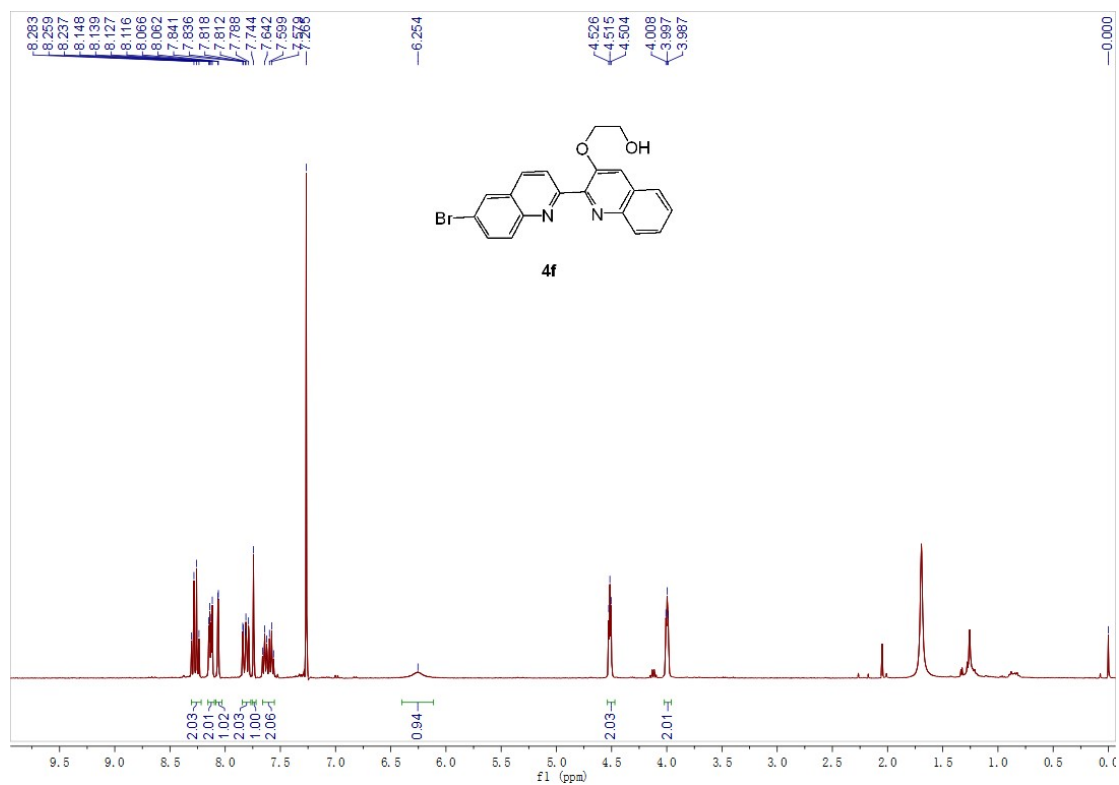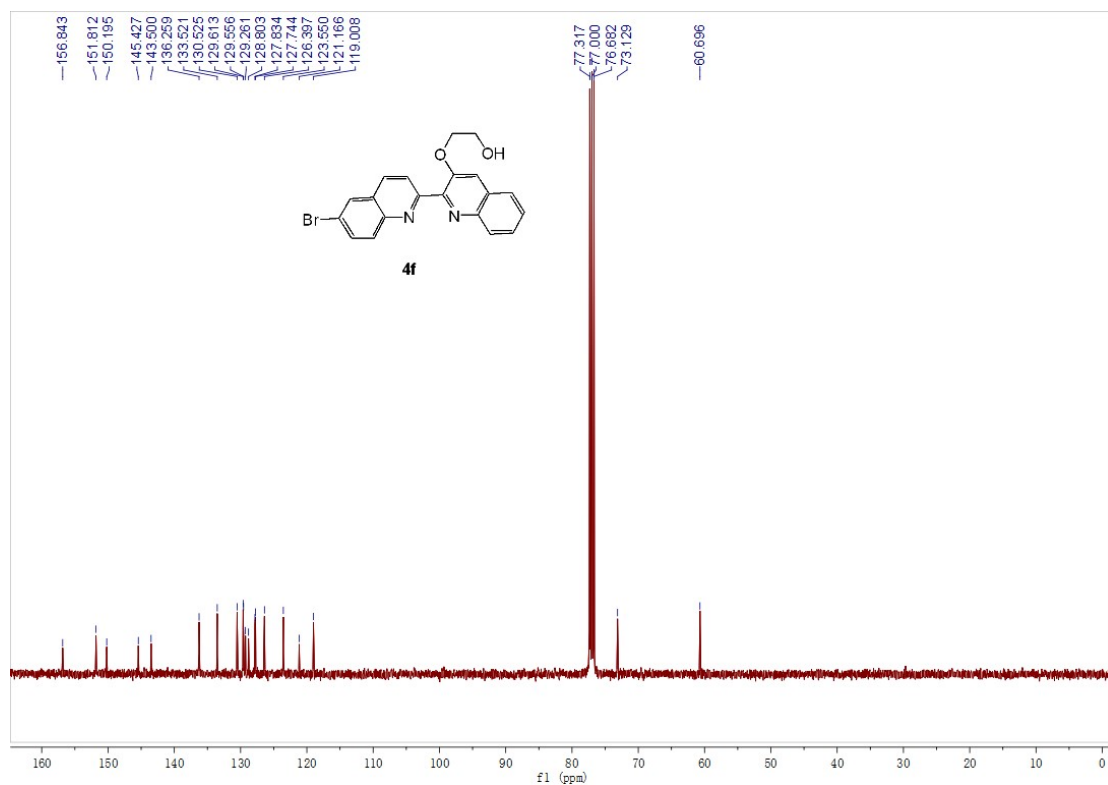

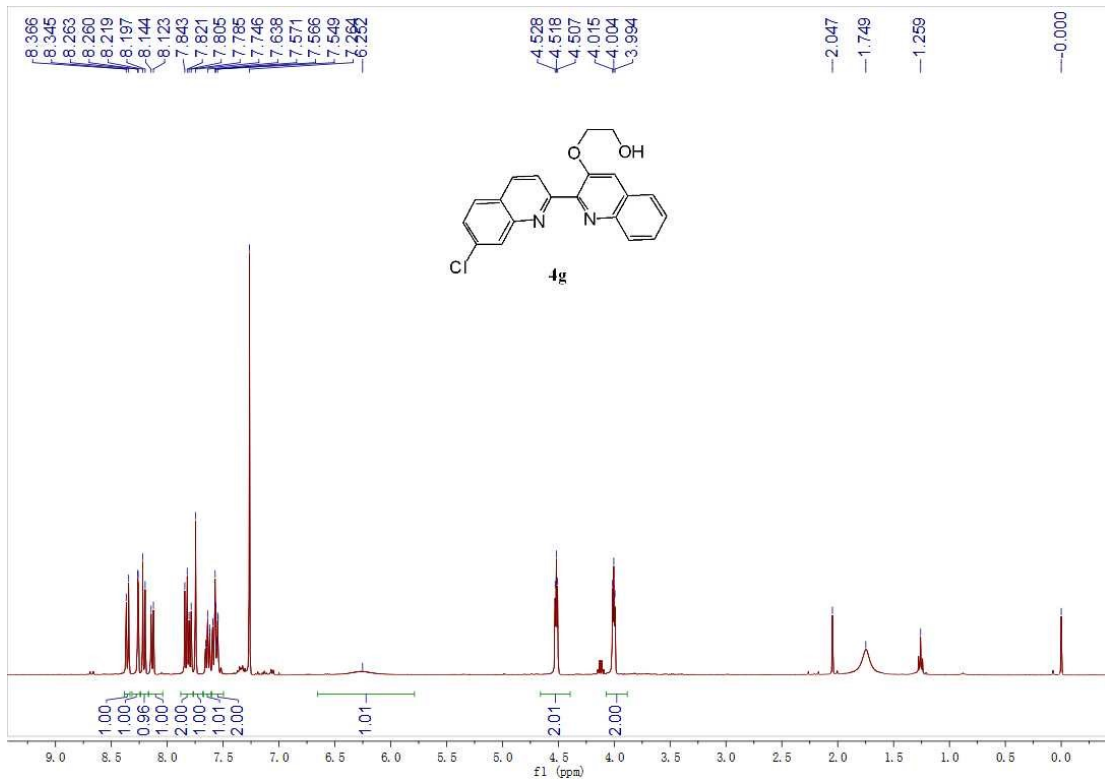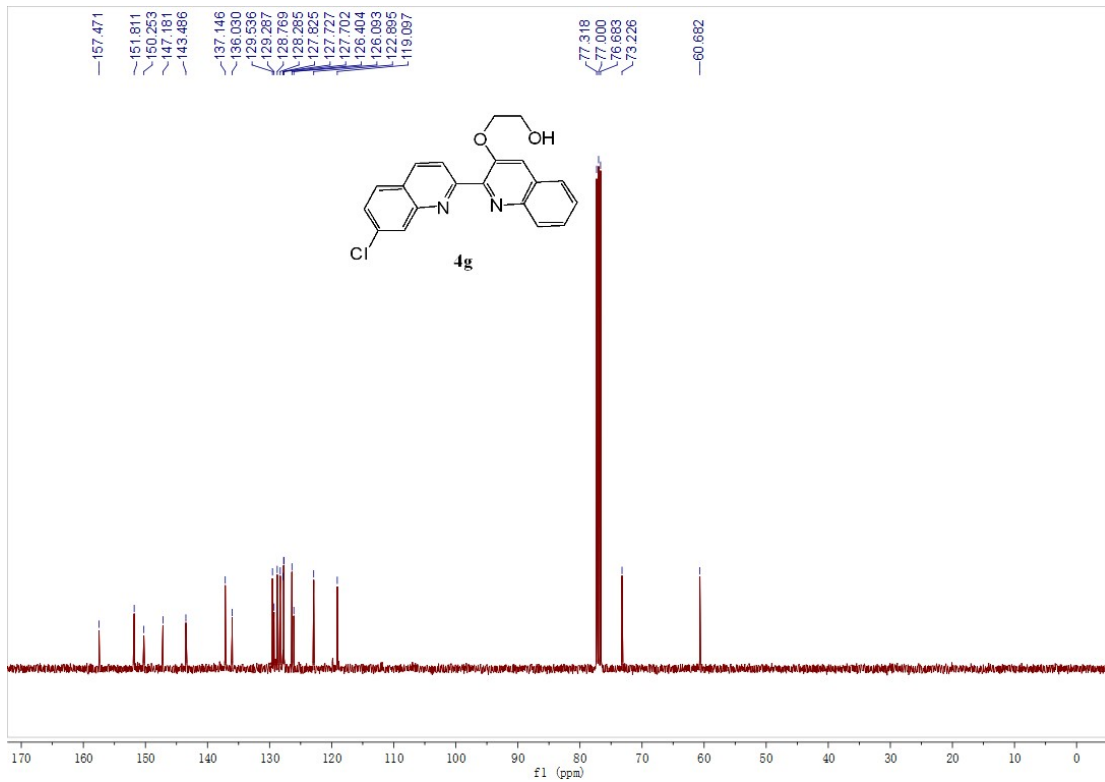

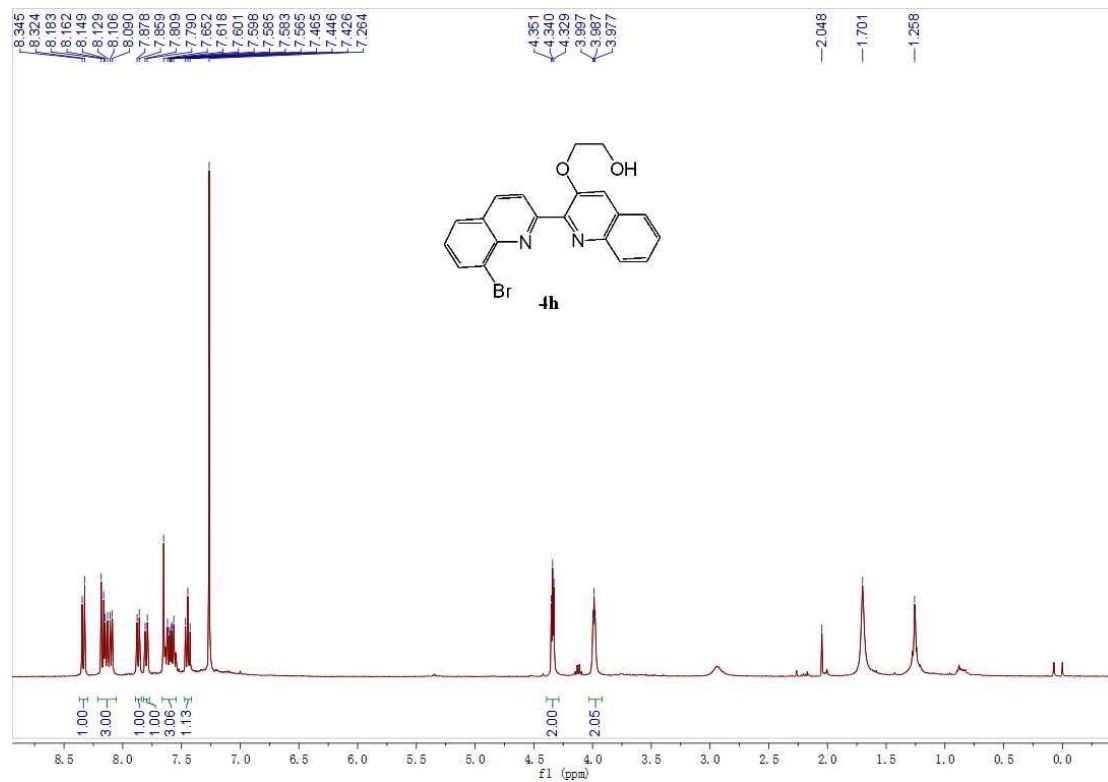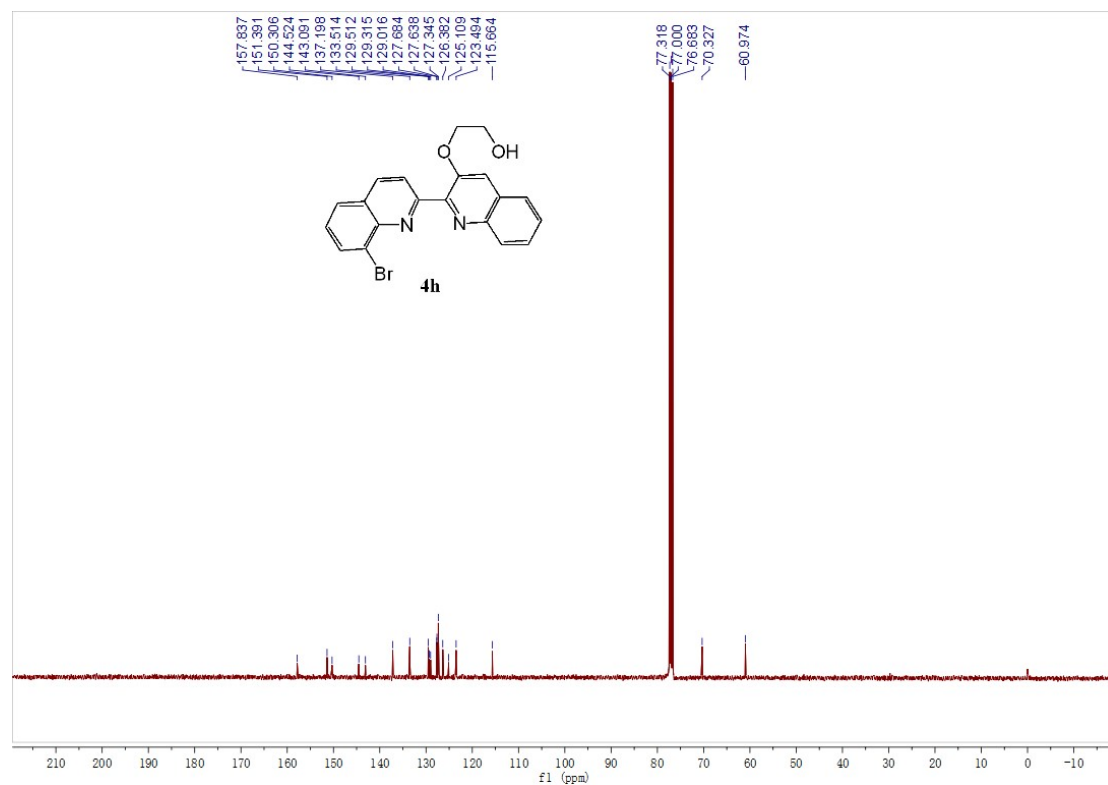

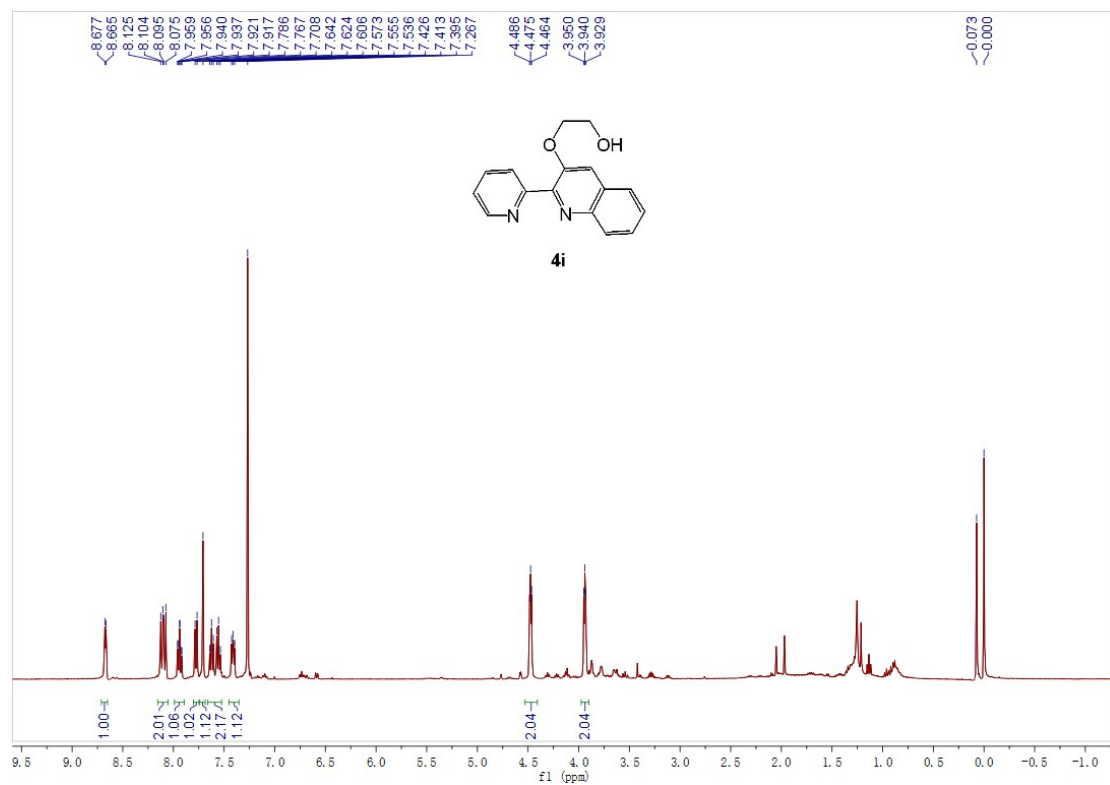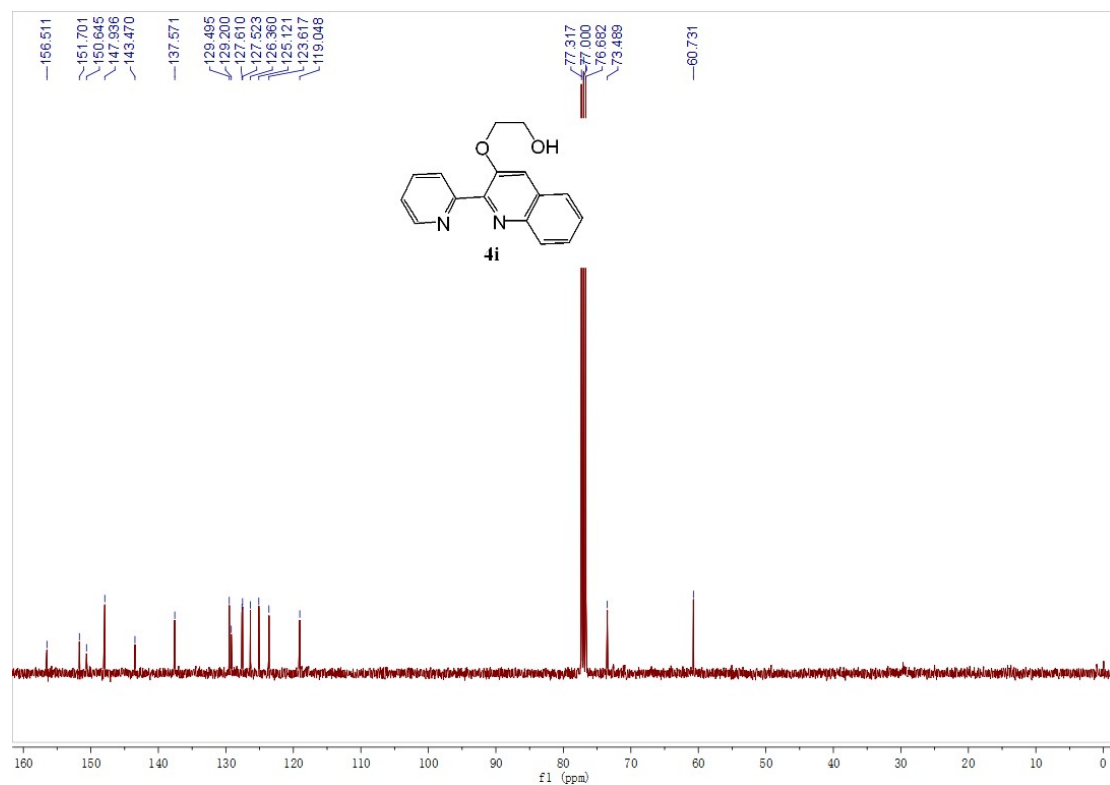

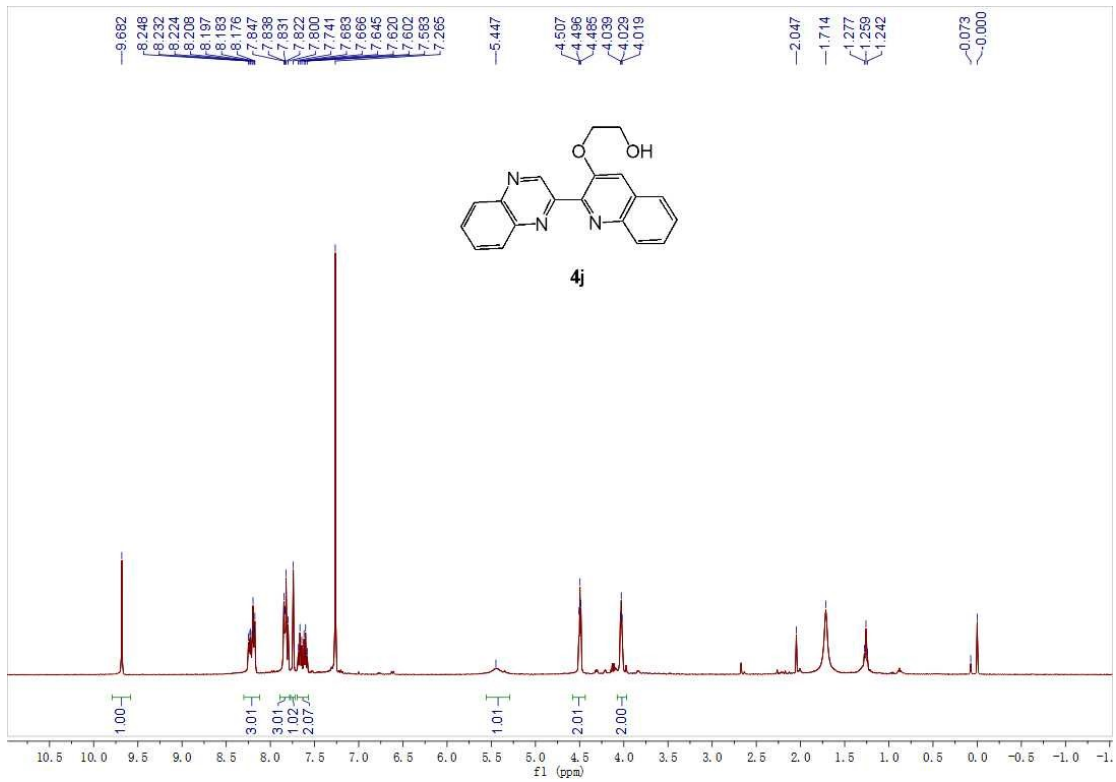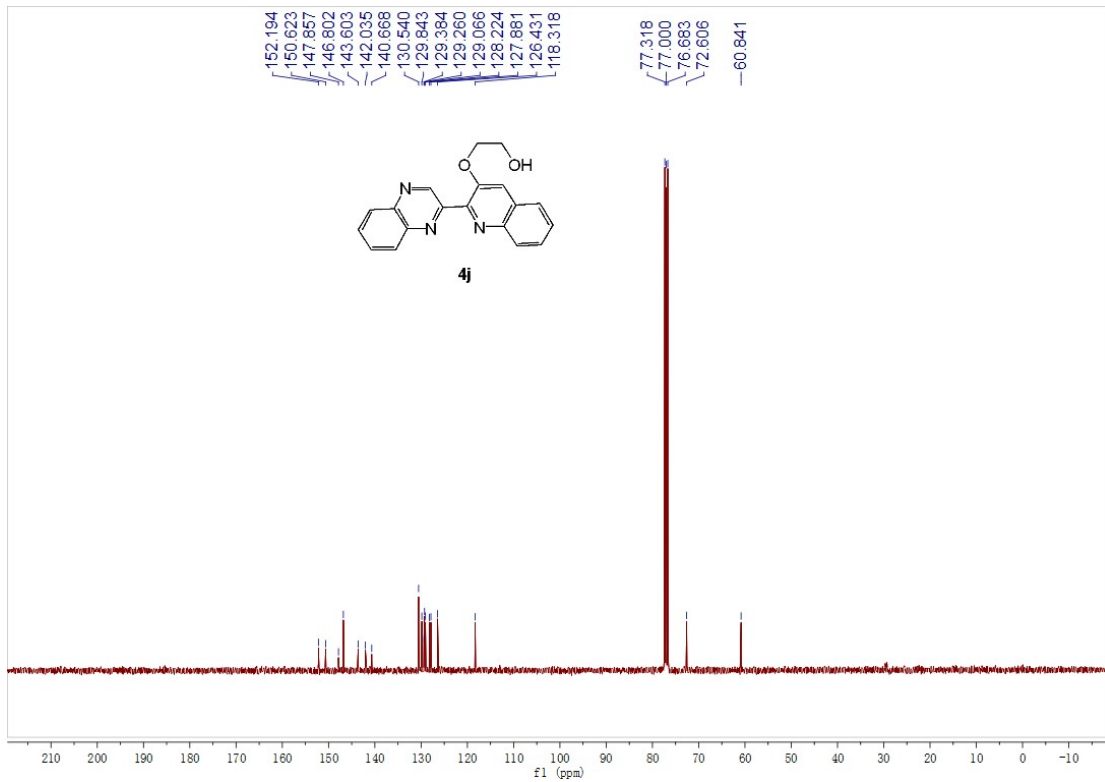



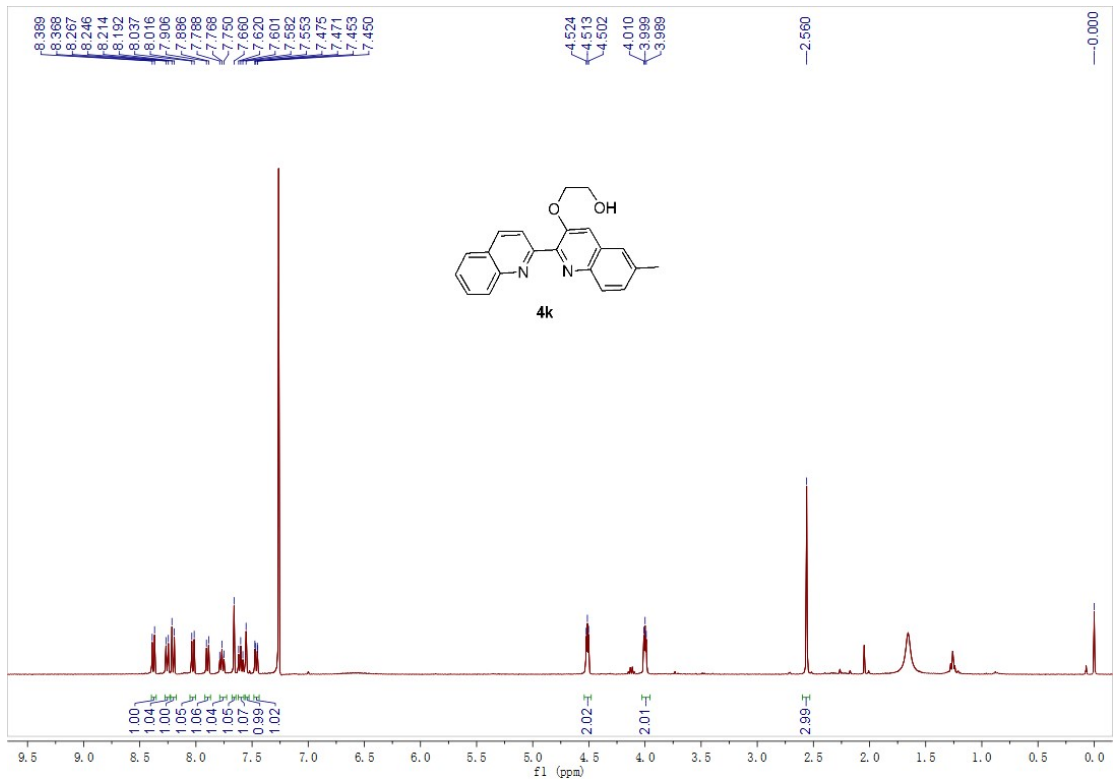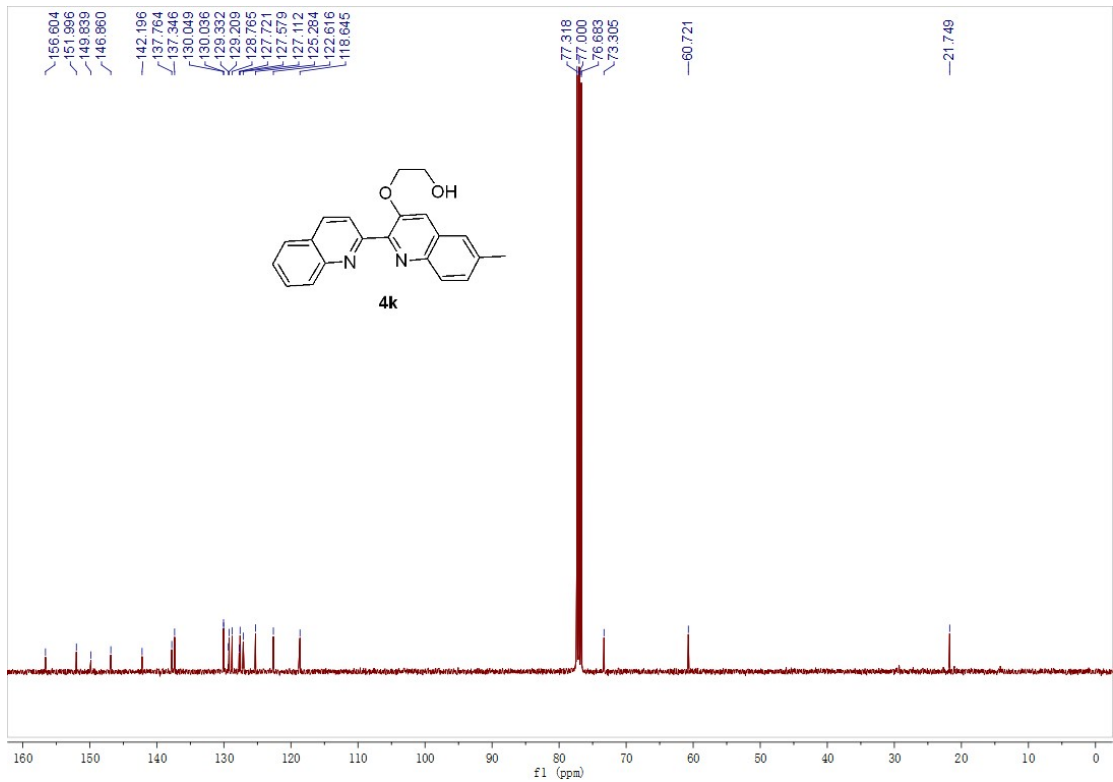

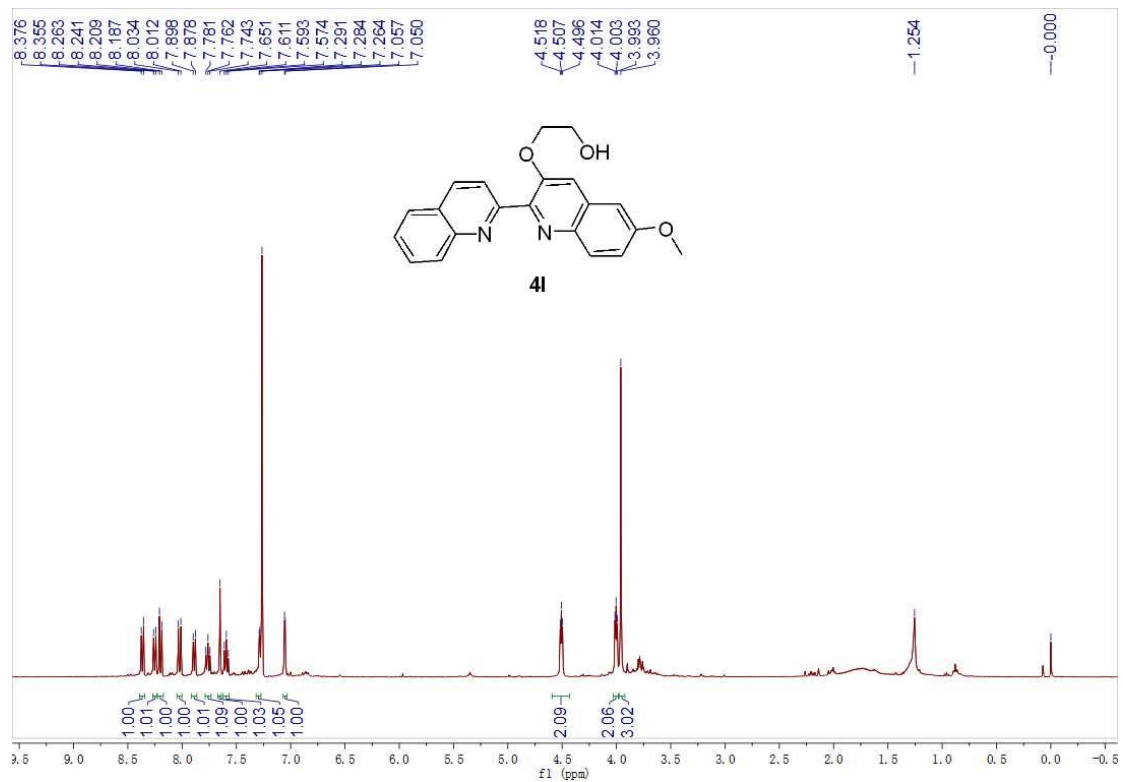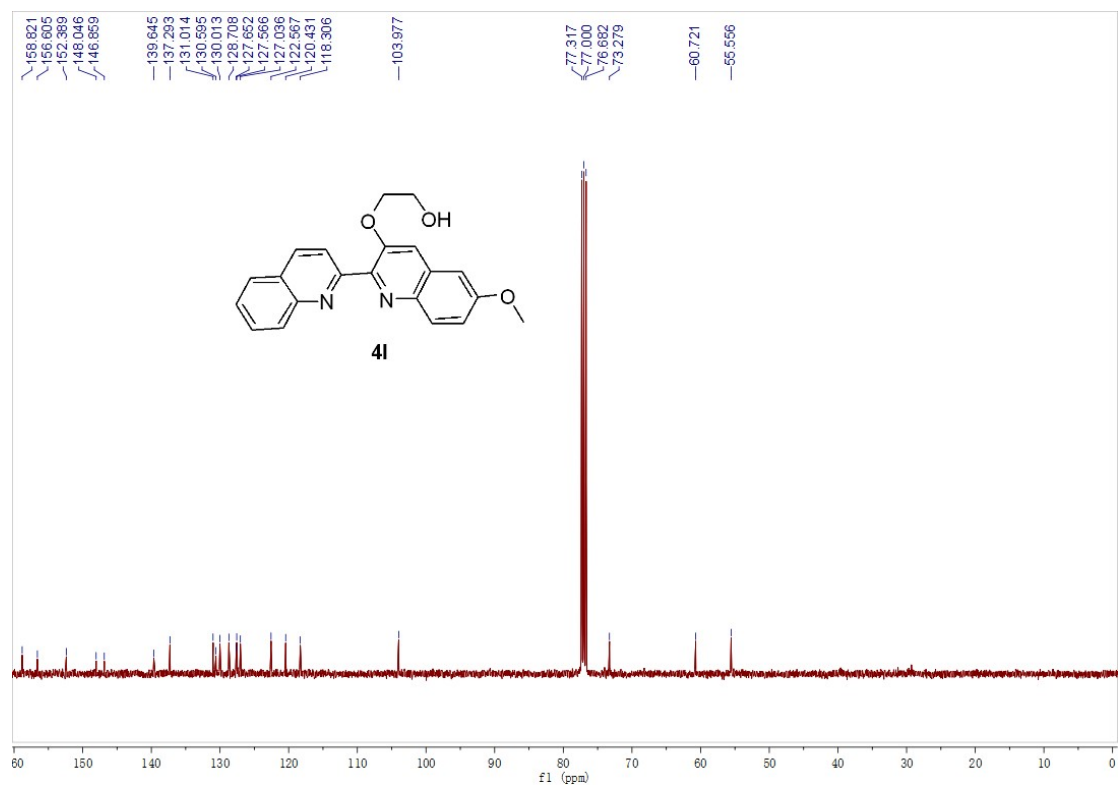

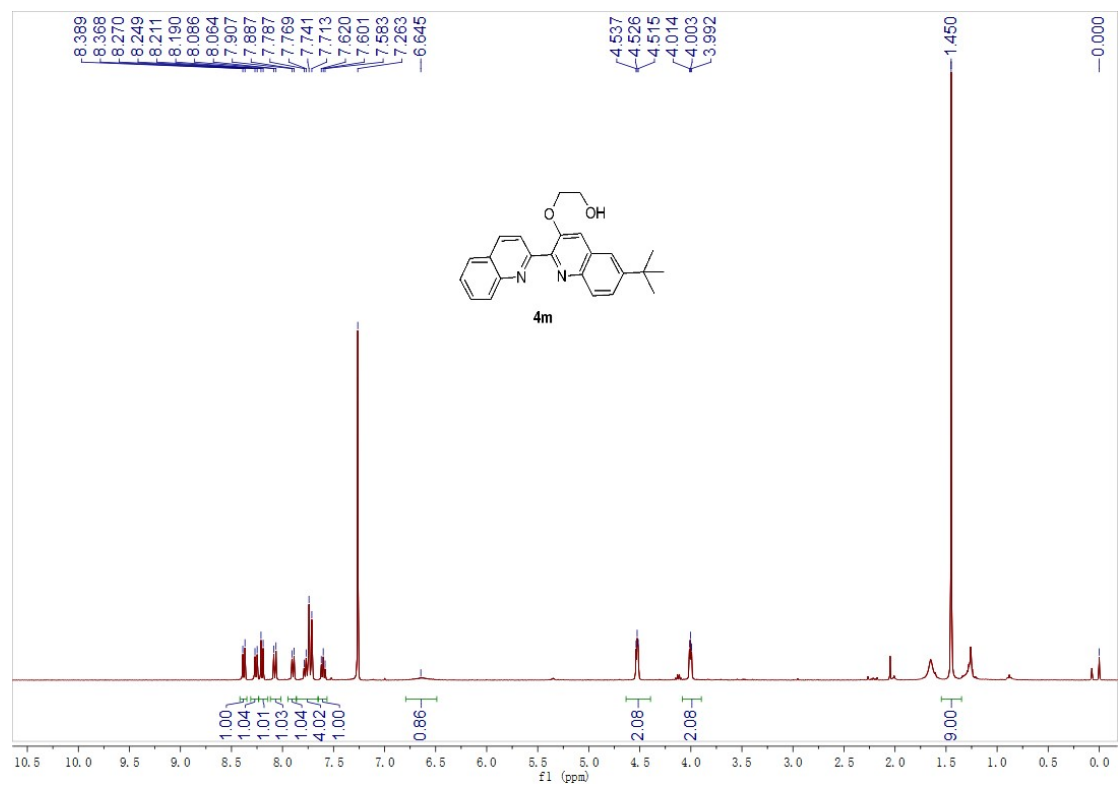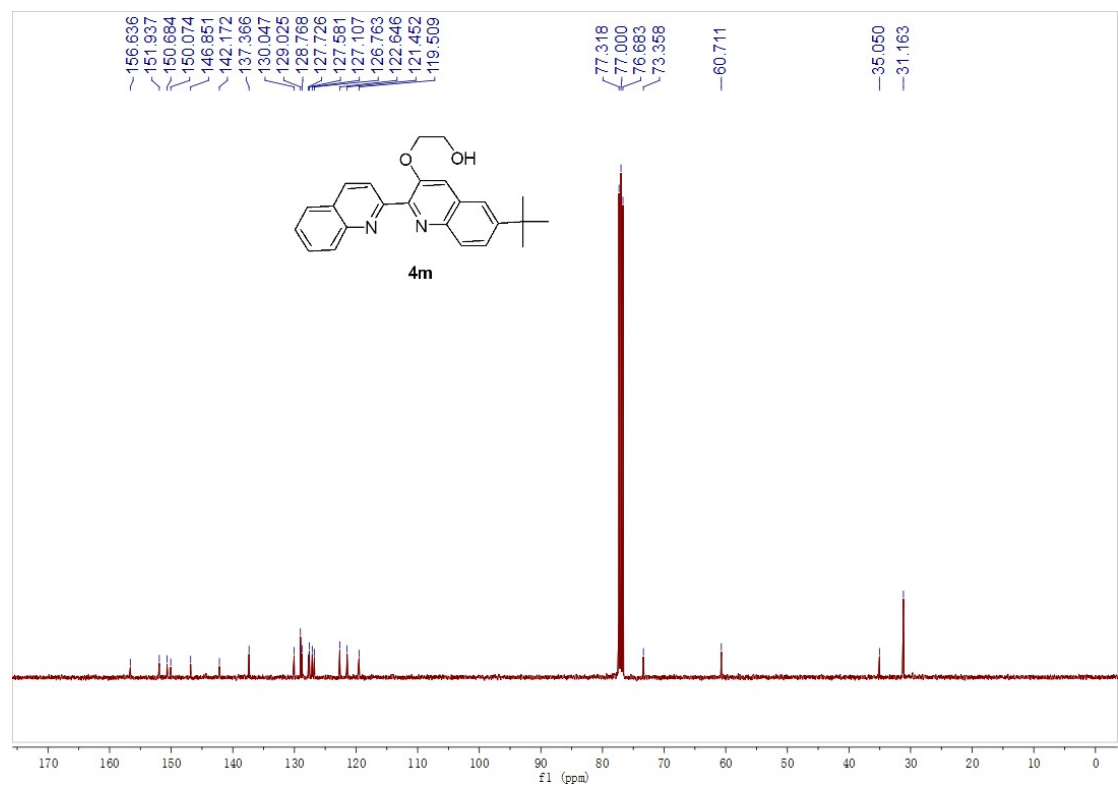

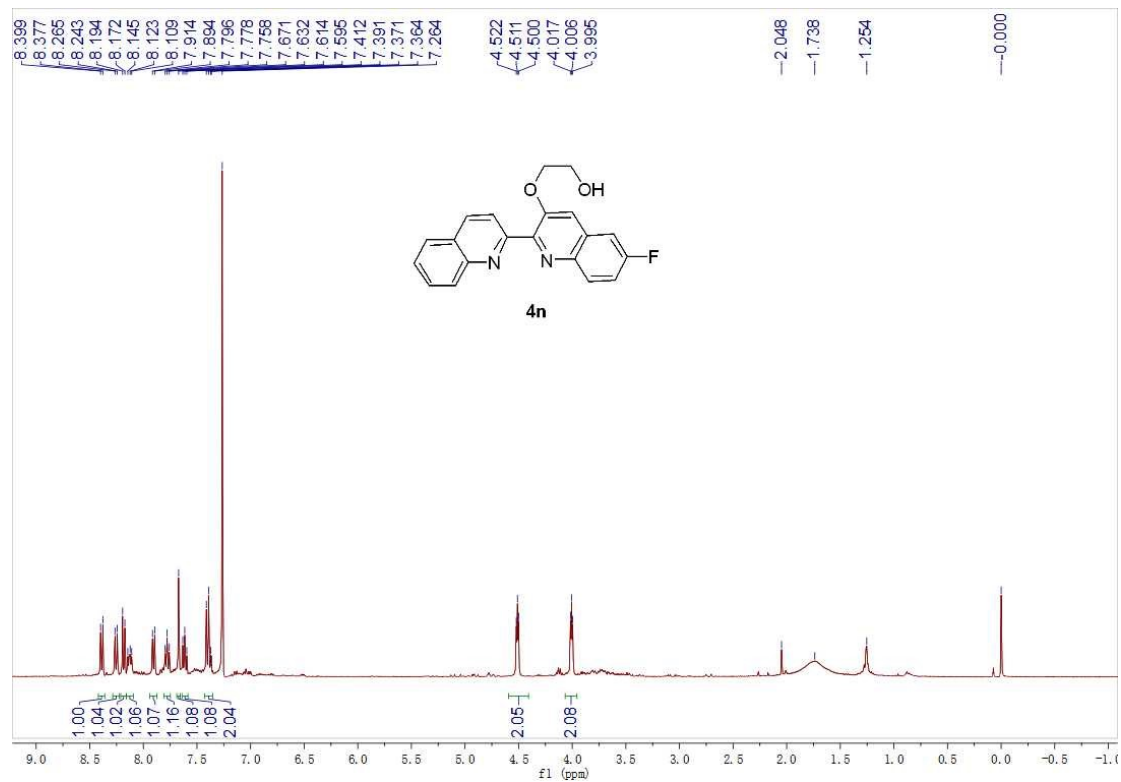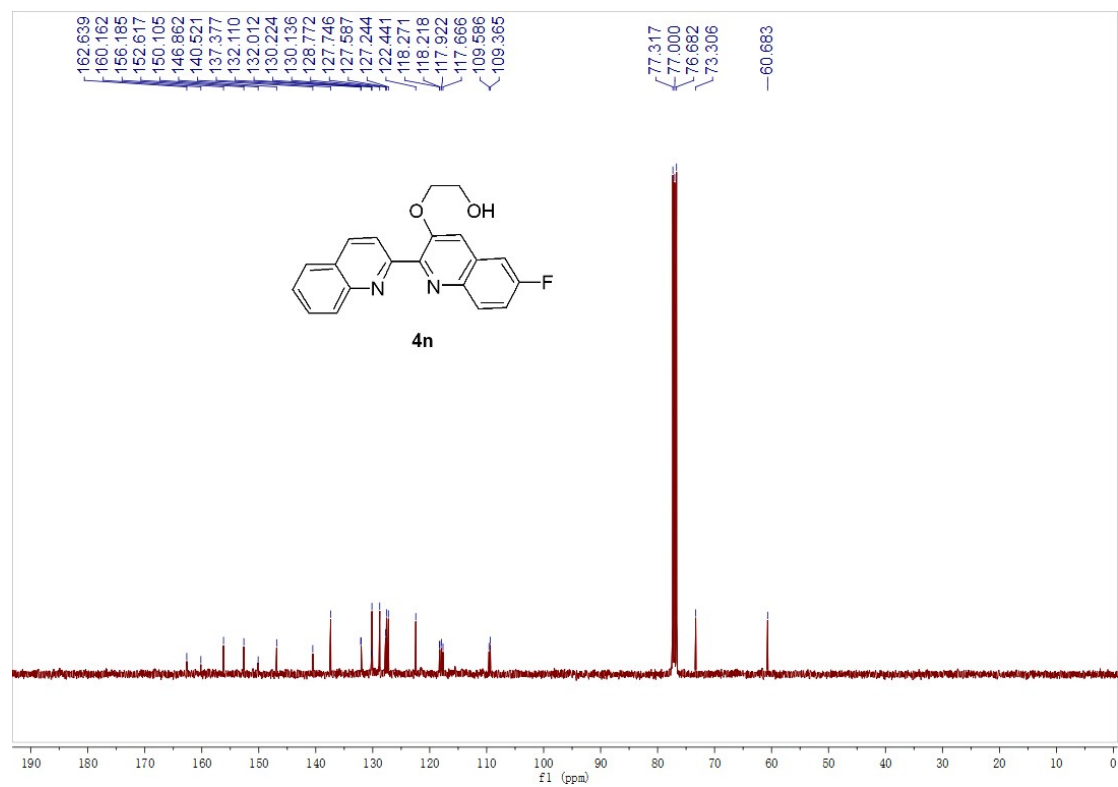

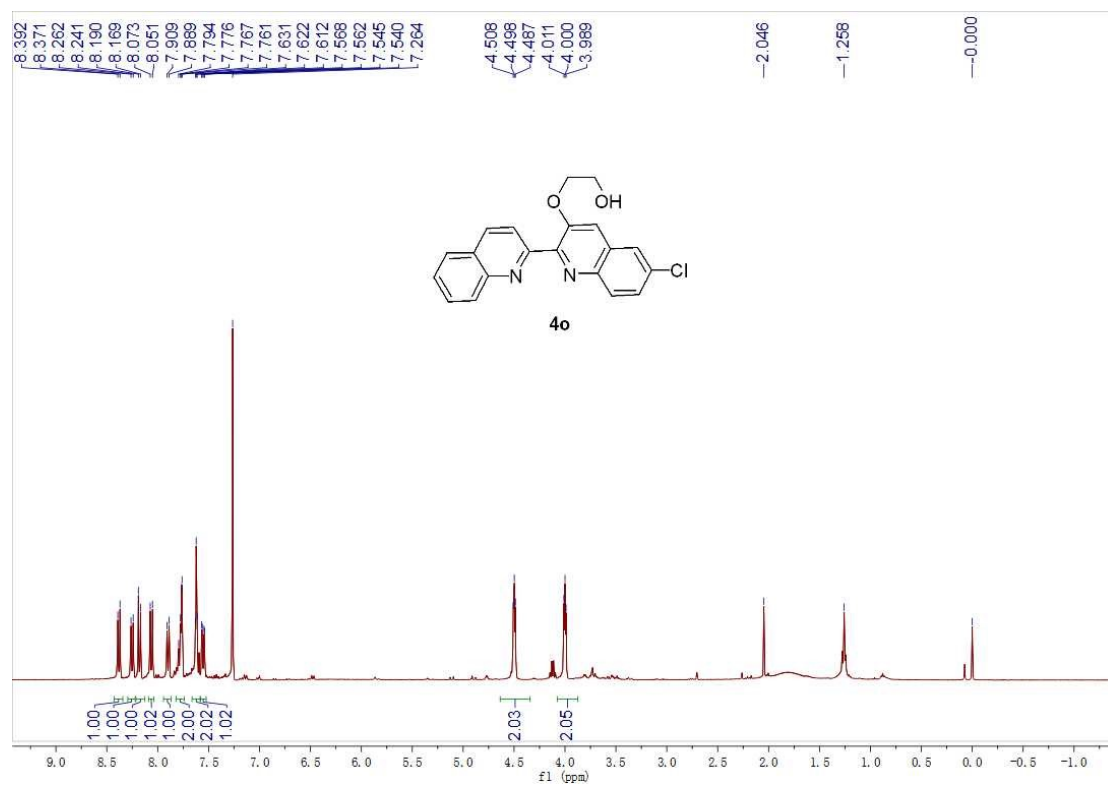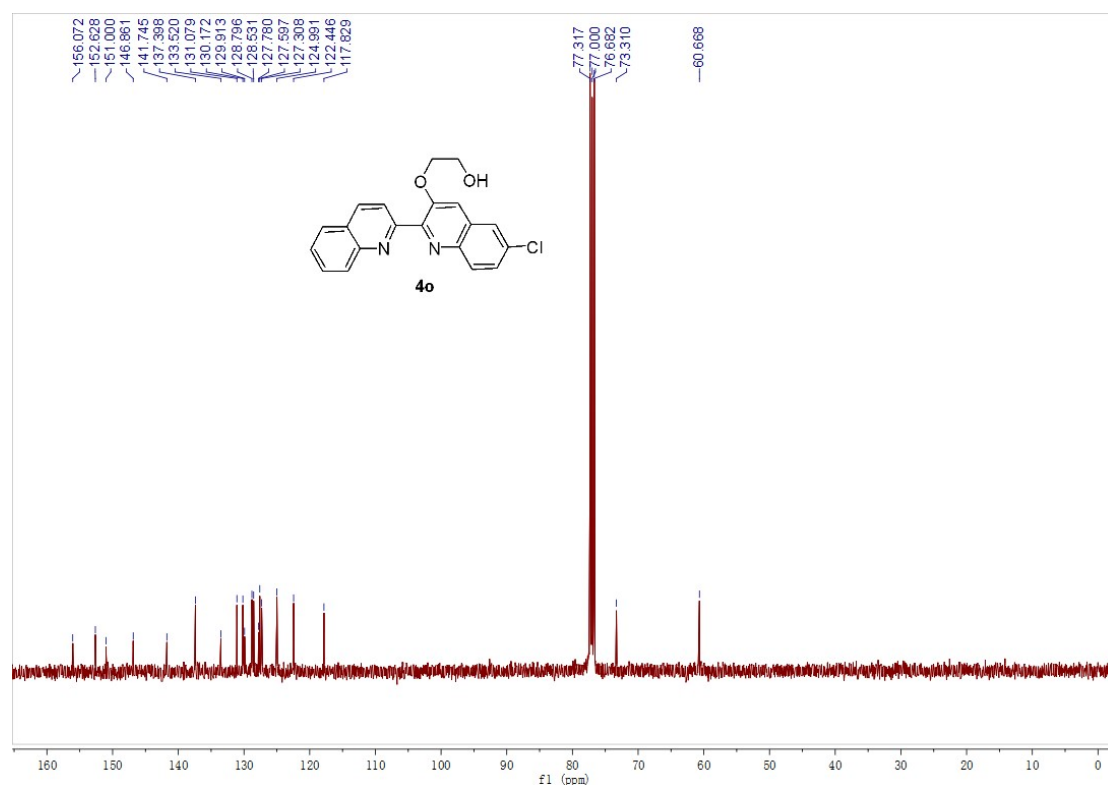



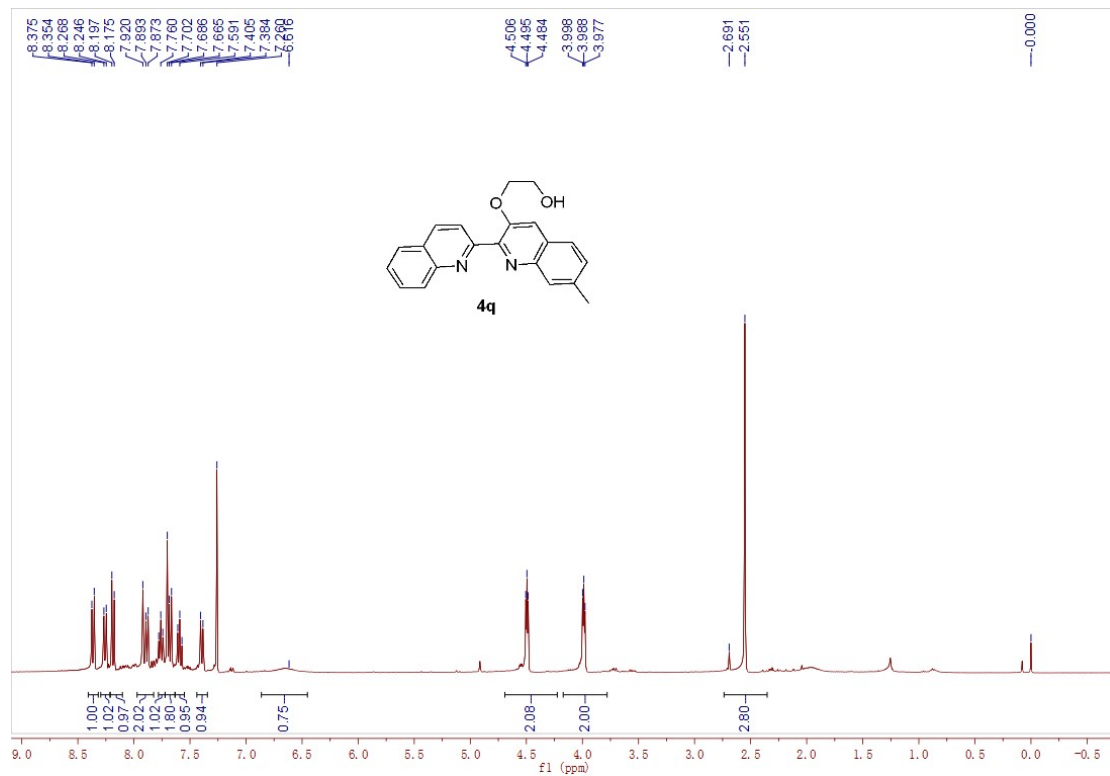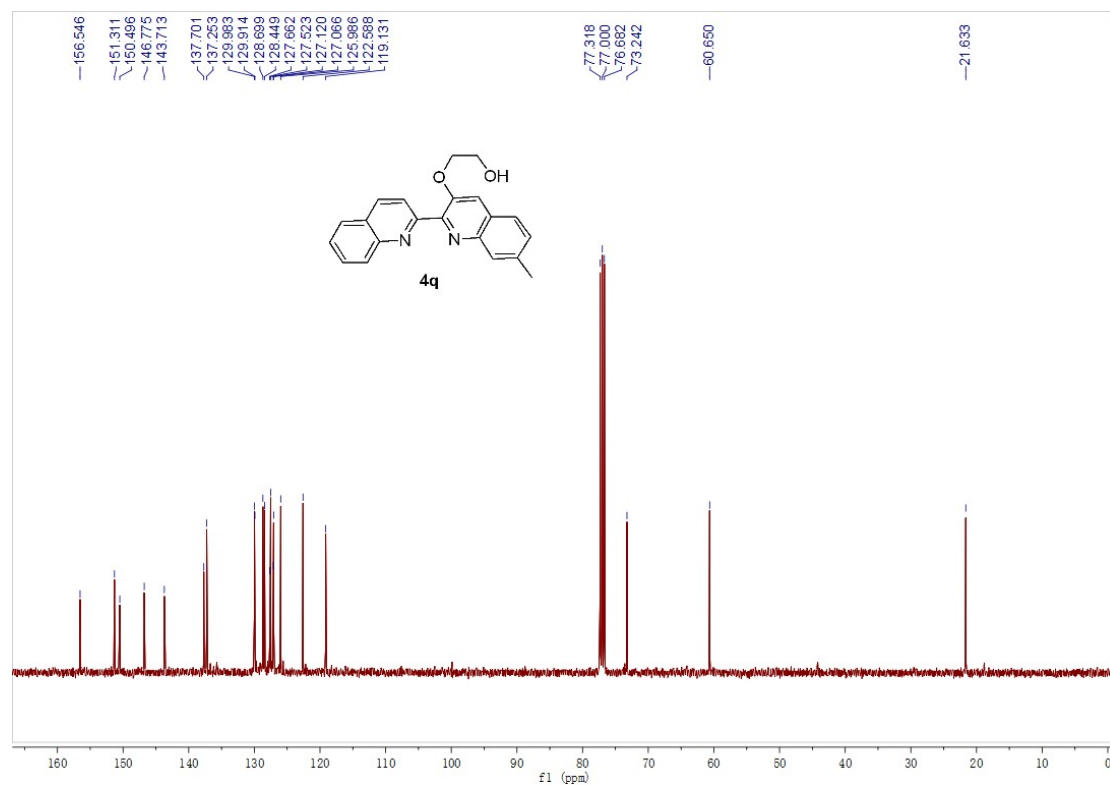

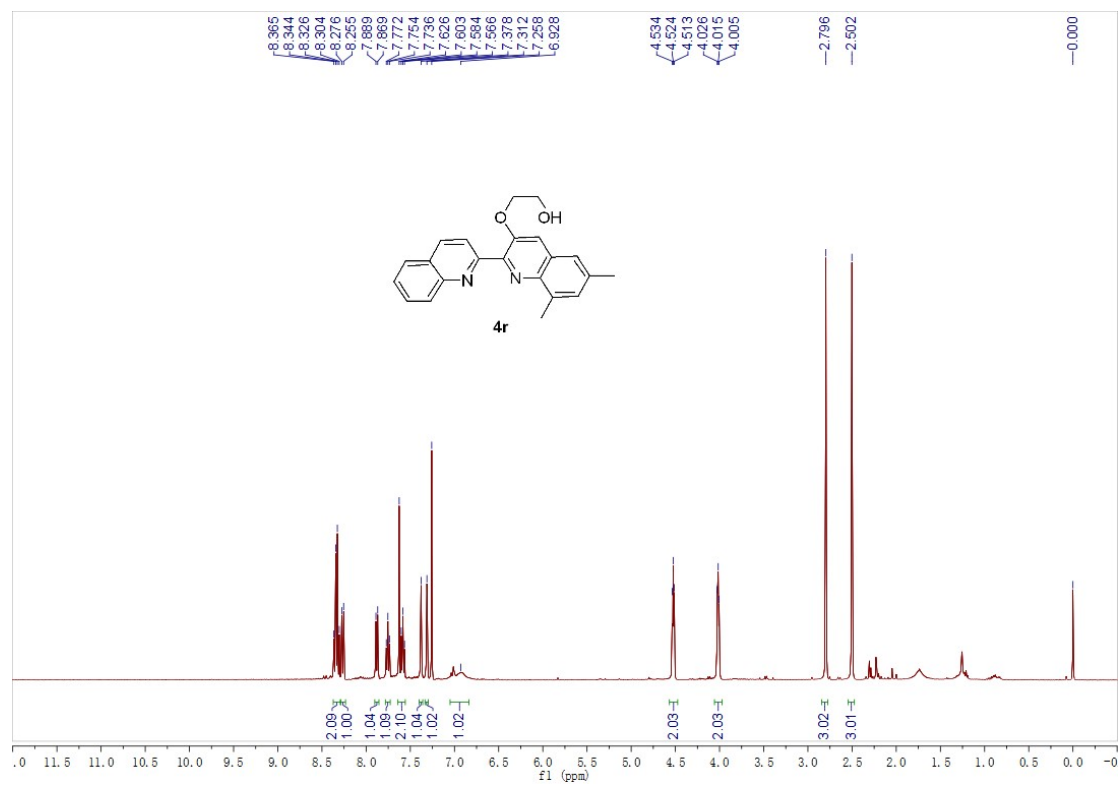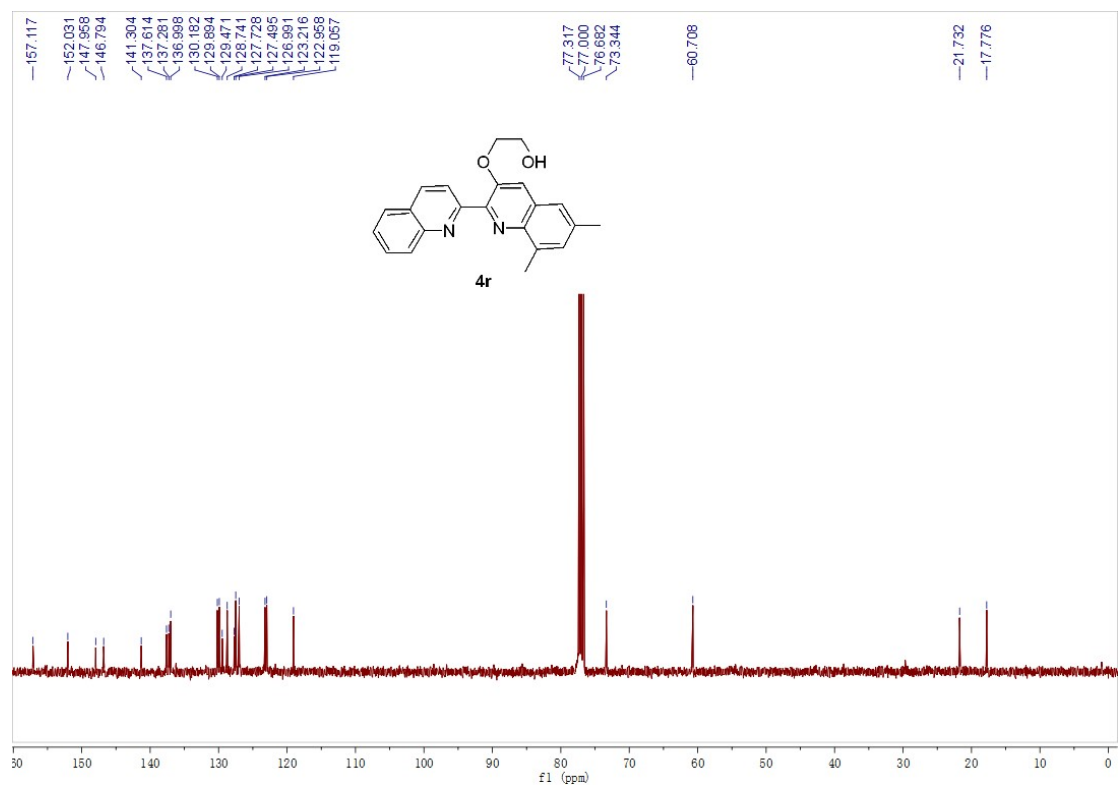



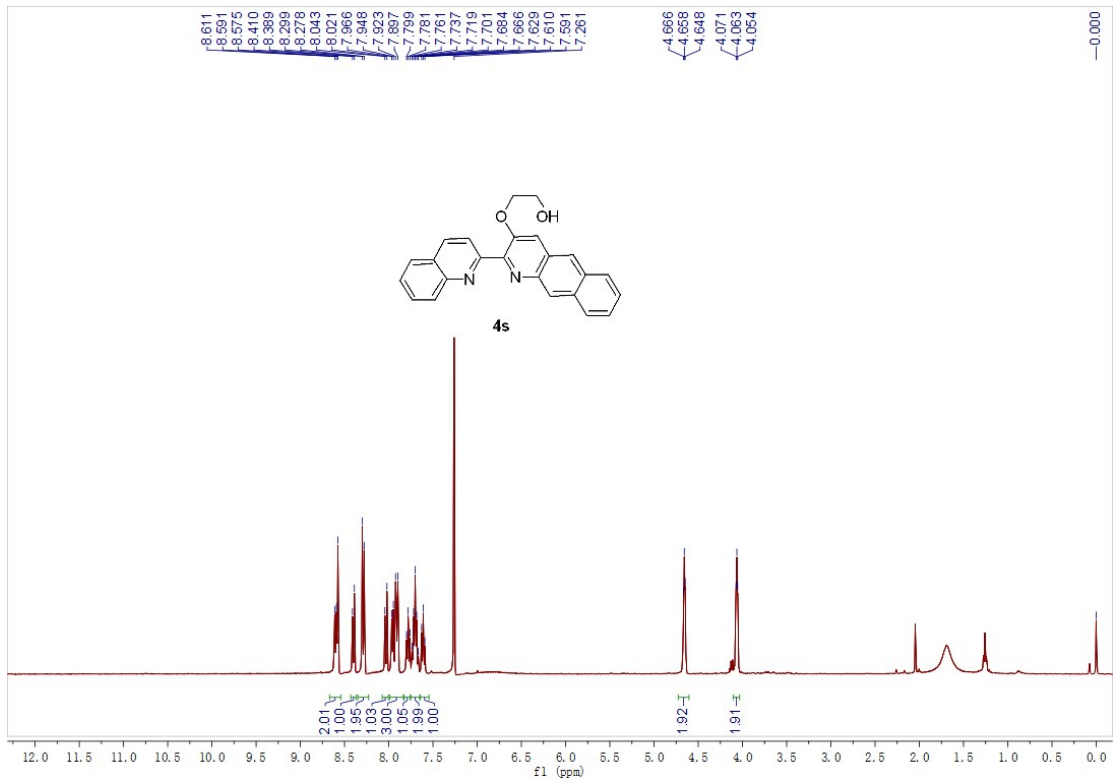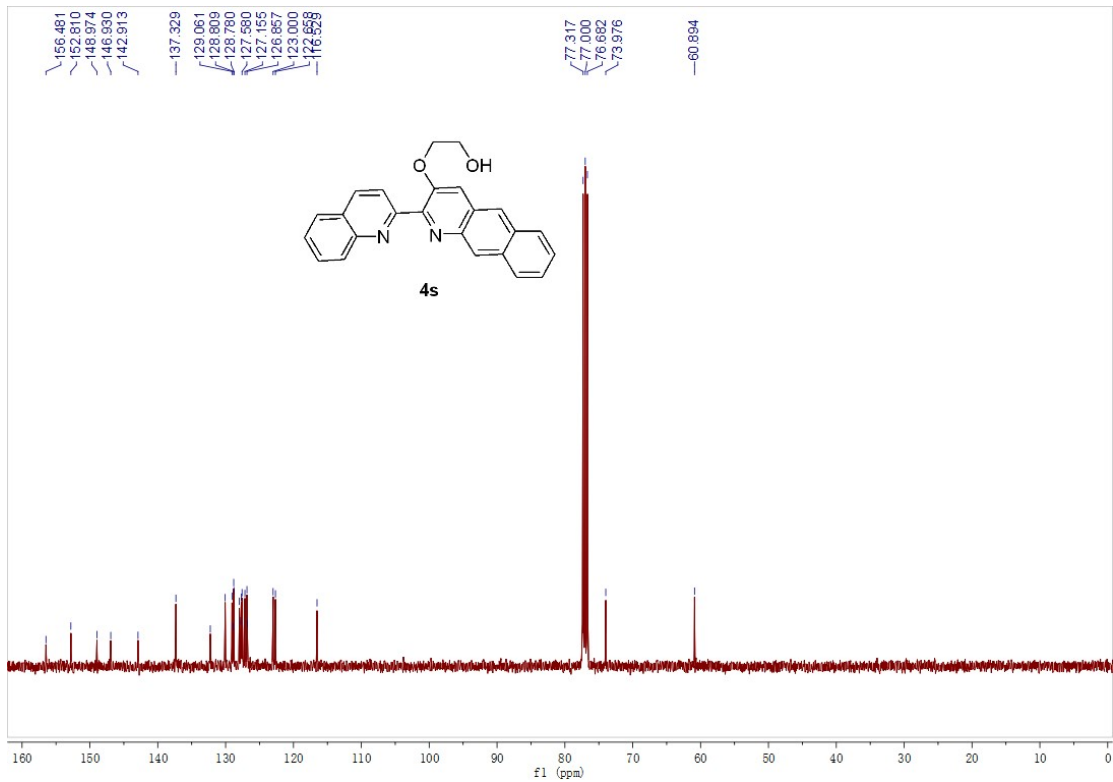

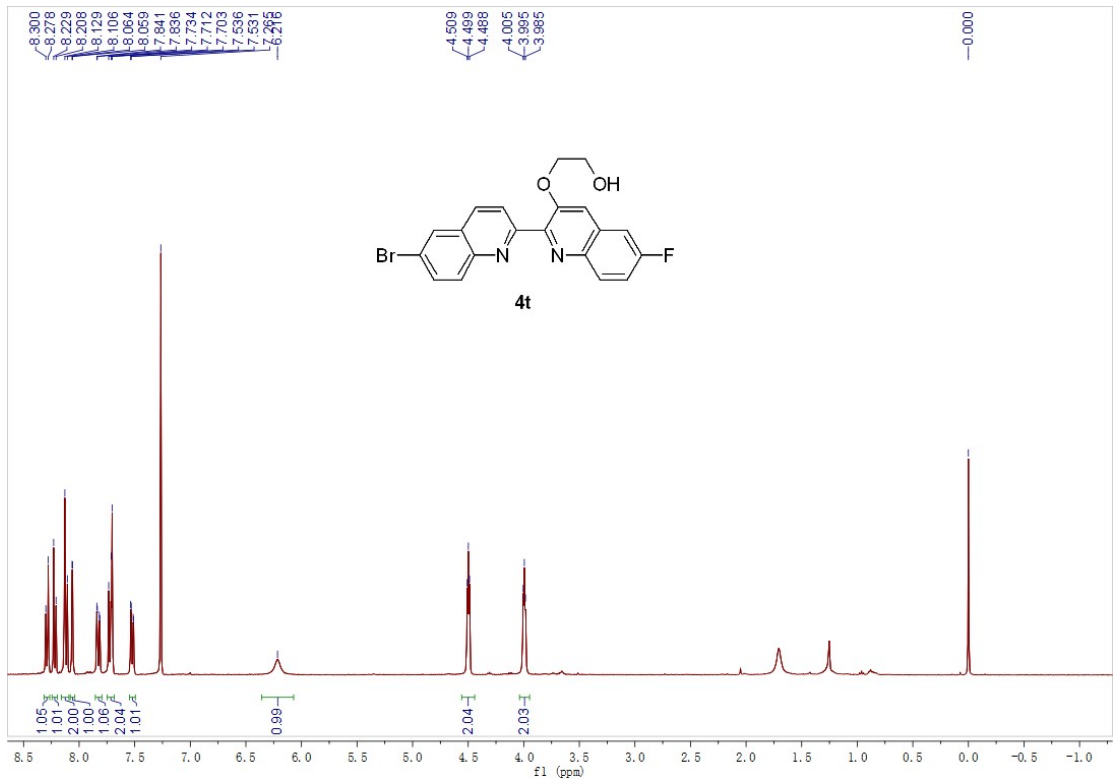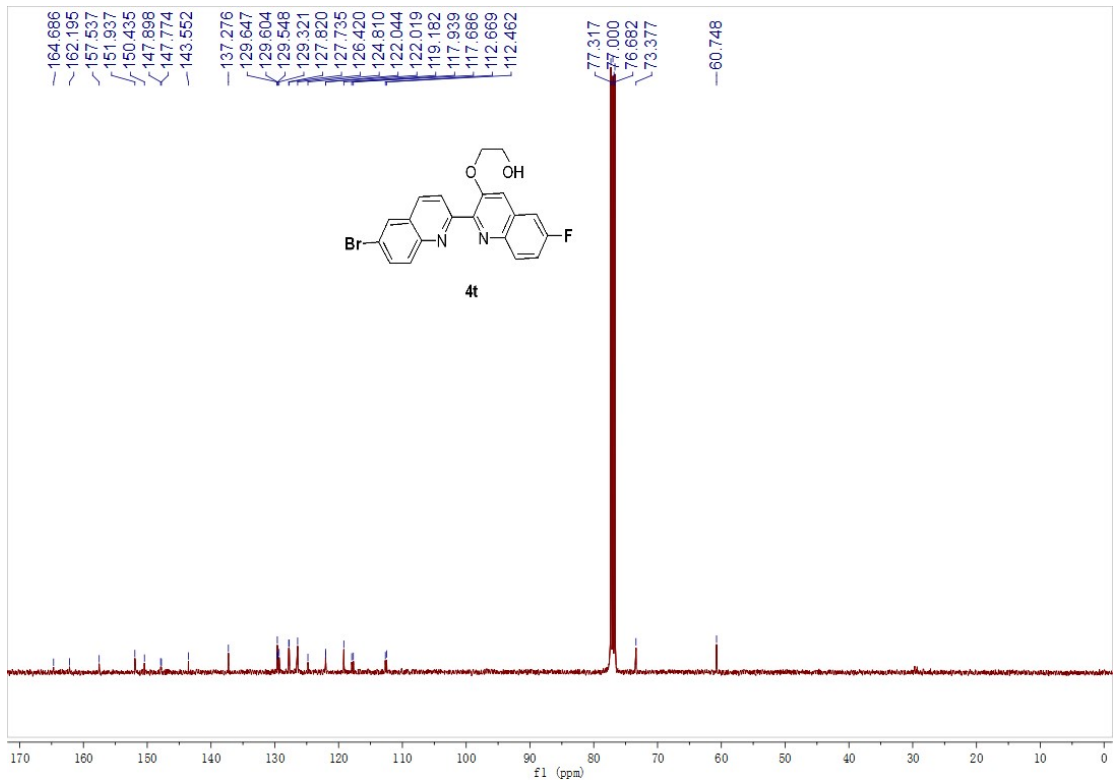

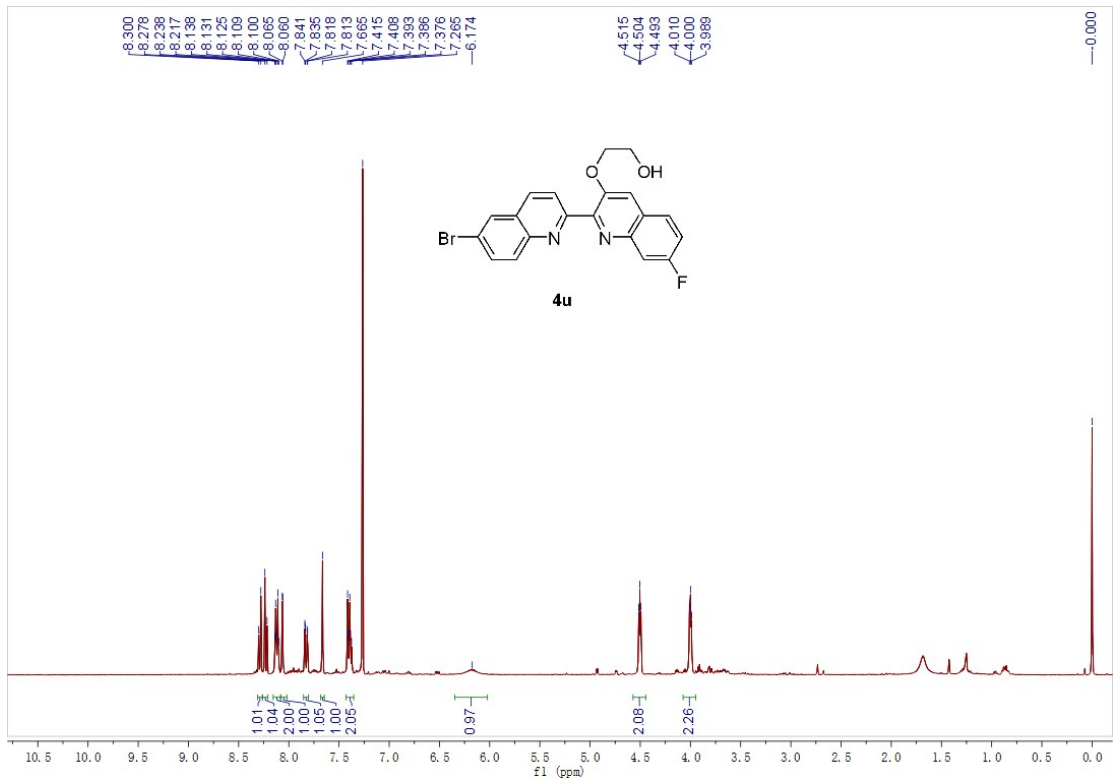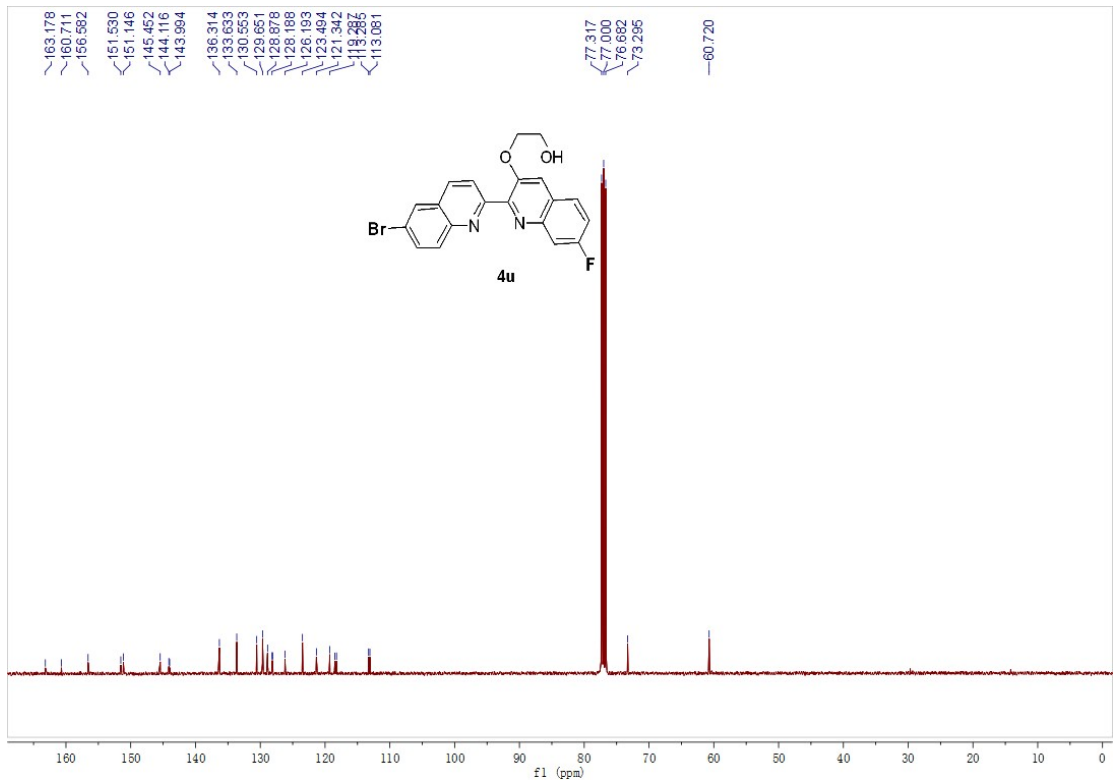

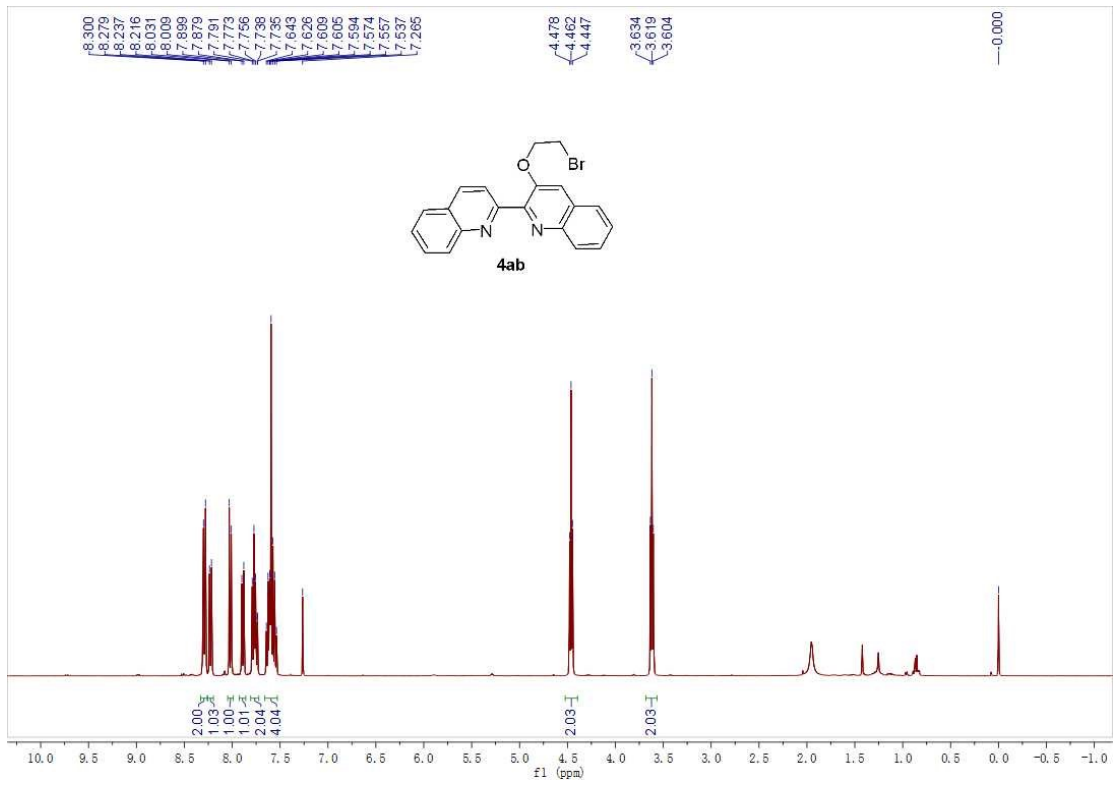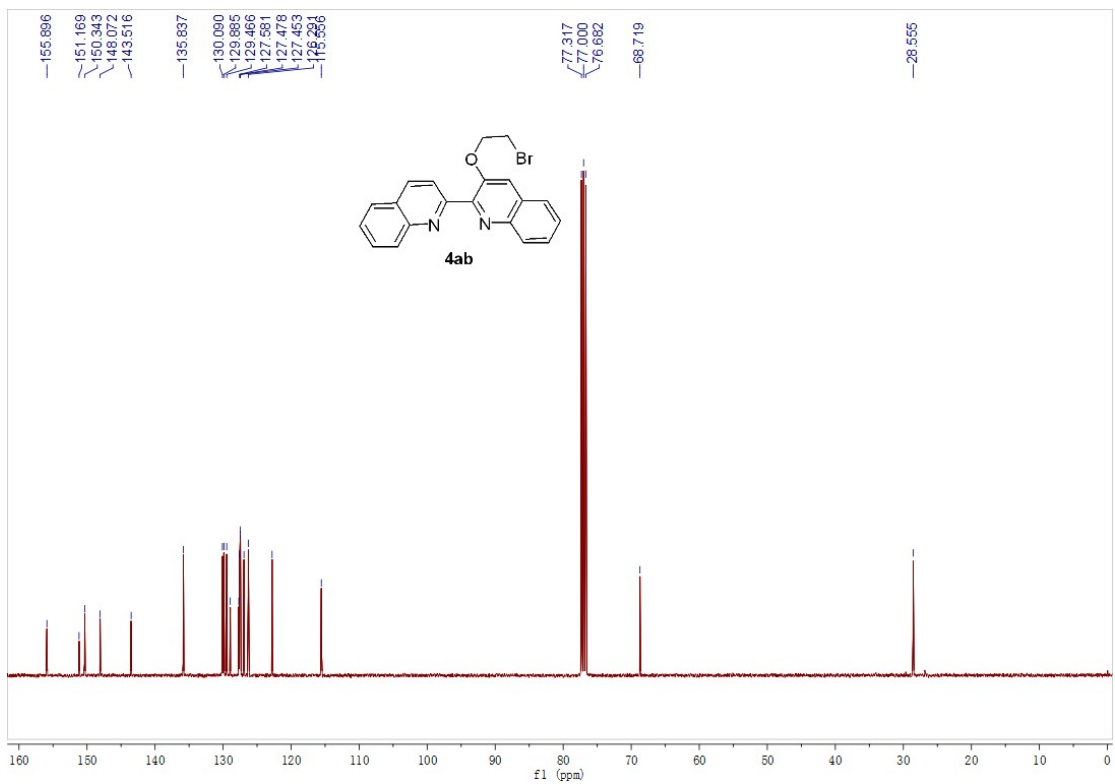

Supplement: d1qo01125a1.pdf [file d1qo01125a1.pdf]
